# Supplementary material for: Strategies to enhance recruitment and consent to intensive care studies: a qualitative study with researchers and patient–public involvement contributors
Source: PubMed Central journal article supplement — BMJ Open. 2021 Sep 22;11(9):e048193. doi: 10.1136/bmjopen-2020-048193 (PMC8461270; doi:10.1136/bmjopen-2020-048193), 2021-09-22
Supplement: bmjopen-2020-048193.draft_revisions.pdf [file bmjopen-2020-048193.draft_revisions.pdf]

# BMJ Open

BMJ Open is committed to open peer review. As part of this commitment we make the peer review history of every article we publish publicly available.

When an article is published we post the peer reviewers' comments and the authors' responses online. We also post the versions of the paper that were used during peer review. These are the versions that the peer review comments apply to.

The versions of the paper that follow are the versions that were submitted during the peer review process. They are not the versions of record or the final published versions. They should not be cited or distributed as the published version of this manuscript.

BMJ Open is an open access journal and the full, final, typeset and author-corrected version of record of the manuscript is available on our site with no access controls, subscription charges or pay-per-view fees (<http://bmjopen.bmj.com>).

If you have any questions on BMJ Open's open peer review process please email [info.bmjopen@bmj.com](mailto:info.bmjopen@bmj.com)

# BMJ Open

## Strategies to enhance recruitment and consent to intensive care studies: qualitative study with researchers and patient-public involvement contributors

|                               |                                                                                                                                                                                                                                                                                                                                                                                                                            |
|-------------------------------|----------------------------------------------------------------------------------------------------------------------------------------------------------------------------------------------------------------------------------------------------------------------------------------------------------------------------------------------------------------------------------------------------------------------------|
| Journal:                      | <i>BMJ Open</i>                                                                                                                                                                                                                                                                                                                                                                                                            |
| Manuscript ID                 | bmjopen-2020-048193                                                                                                                                                                                                                                                                                                                                                                                                        |
| Article Type:                 | Original research                                                                                                                                                                                                                                                                                                                                                                                                          |
| Date Submitted by the Author: | 18-Dec-2020                                                                                                                                                                                                                                                                                                                                                                                                                |
| Complete List of Authors:     | Paddock, Katie; Manchester Metropolitan University, Department of Childhood, Youth and Education Studies<br>Woolfall, Kerry; University of Liverpool<br>Frith, Lucy; University of Liverpool<br>Watkins, Megan; University of Liverpool<br>Gamble, Carrol; University of Liverpool<br>Welters, Ingeborg; University of Liverpool, Institute of Life Course and Medical Sciences<br>Young, Bridget; University of Liverpool |
| Keywords:                     | INTENSIVE & CRITICAL CARE, QUALITATIVE RESEARCH, Adult intensive & critical care < INTENSIVE & CRITICAL CARE                                                                                                                                                                                                                                                                                                               |
|                               |                                                                                                                                                                                                                                                                                                                                                                                                                            |

SCHOLARONE™  
Manuscripts

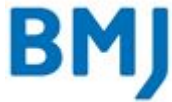

I, the Submitting Author has the right to grant and does grant on behalf of all authors of the Work (as defined in the below author licence), an exclusive licence and/or a non-exclusive licence for contributions from authors who are: i) UK Crown employees; ii) where BMJ has agreed a CC-BY licence shall apply, and/or iii) in accordance with the terms applicable for US Federal Government officers or employees acting as part of their official duties; on a worldwide, perpetual, irrevocable, royalty-free basis to BMJ Publishing Group Ltd ("BMJ") its licensees and where the relevant Journal is co-owned by BMJ to the co-owners of the Journal, to publish the Work in this journal and any other BMJ products and to exploit all rights, as set out in our [licence](#).

The Submitting Author accepts and understands that any supply made under these terms is made by BMJ to the Submitting Author unless you are acting as an employee on behalf of your employer or a postgraduate student of an affiliated institution which is paying any applicable article publishing charge ("APC") for Open Access articles. Where the Submitting Author wishes to make the Work available on an Open Access basis (and intends to pay the relevant APC), the terms of reuse of such Open Access shall be governed by a Creative Commons licence – details of these licences and which [Creative Commons](#) licence will apply to this Work are set out in our licence referred to above.

Other than as permitted in any relevant BMJ Author's Self Archiving Policies, I confirm this Work has not been accepted for publication elsewhere, is not being considered for publication elsewhere and does not duplicate material already published. I confirm all authors consent to publication of this Work and authorise the granting of this licence.

1  
2  
3  
4  
5  
6  
7  
8  
9

## Strategies to enhance recruitment and consent to intensive care studies: qualitative study with researchers and patient-public involvement contributors

10  
11

### Corresponding author:

12  
13

Dr Katie Paddock

14  
15  
16  
17  
18  
19

Department of Childhood, Youth and Education Studies, Faculty of Education  
Manchester Metropolitan University  
1.43 Brooks Building, 53 Bonsall Street  
Manchester, M15 6GX  
k.paddock@mmu.ac.uk

20  
21

### Co-author details

22  
23  
24

Kerry Woolfall, Institute of Population Health, University of Liverpool, Liverpool, United Kingdom,  
k.woolfall@liverpool.ac.uk

25  
26  
27  
28

Lucy Frith, Institute of Population Health, University of Liverpool, Liverpool, United Kingdom,  
L.J.Frith@liverpool.ac.uk

29  
30  
31  
32

Megan Watkins, Institute of Population Health, University of Liverpool, Liverpool, United Kingdom,  
Megan.Watkins@liverpool.ac.uk

33  
34  
35  
36

Carrol Gamble, Institute of Population Health, University of Liverpool, Liverpool, United Kingdom,  
C.Gamble@liverpool.ac.uk

37  
38  
39  
40  
41

Ingeborg Welters, Department of Critical Care, Liverpool University Hospitals NHS Foundation Trust,  
Liverpool, United Kingdom / Institute of Life Course and Medical Sciences, University of Liverpool,  
Liverpool, UK, I.Welters@liverpool.ac.uk

42  
43  
44  
45

Bridget Young, Institute of Population Health, University of Liverpool, Liverpool, United Kingdom,  
Bridget.Young@liverpool.ac.uk

46  
47  
48  
49  
50  
51  
52  
53  
54  
55  
56  
57  
58  
59  
60

**Word count:** 5807

## Strategies to enhance recruitment and consent to intensive care studies: qualitative study with researchers and patient-public involvement contributors

K. Paddock (1,2); K. Woolfall (1); L. Frith (1); M. Watkins (1), C. Gamble (1); I. D. Welters (3, 4); The Perspectives Study Advisory Group; B. Young (1)

(1) Institute of Population Health, University of Liverpool, Liverpool, United Kingdom;

(2) Department of Childhood, Youth and Education Studies | Faculty of Education | Manchester Metropolitan University, United Kingdom;

(3) Department of Critical Care, Liverpool University Hospitals NHS Foundation Trust, Liverpool, United Kingdom

(4) Institute of Life Course and Medical Sciences, University of Liverpool, Liverpool, UK

### ABSTRACT

**Objective:** Clinical trials and studies in intensive care units (ICUs) have complex consent processes and often encounter problems in recruiting patients. By interviewing research team members about the challenges in critical care research we aimed to identify strategies to enhance recruitment and consent to ICU studies.

**Methods:** Semi-structured interviews with UK-based researchers (N=17) and patient-public involvement contributors (N=8) with experience of ICU studies. Analysis of transcripts of audio-recorded interviews drew on thematic approaches.

**Results:** Participants emphasised the need for substitute decision-making processes in critical care studies, yet some researchers reported that research ethics committees were reluctant to approve such processes. Researchers spoke about the potential benefits of research without prior consent for studies with narrow recruitment windows but believed research ethics committees would not approve them. Participants indicated that the activity of patient-public involvement contributors was limited in critical care studies, though researchers who had involved patient-public involvement contributors more extensively were clear that their input when designing consent processes was important. Researchers and patient-public involvement contributors pointed to resource and staffing limitations as barriers to patient recruitment. Researchers varied in whether and how they used professional consultees as substitute decision-makers, in whether they approached families by telephone to discuss research, and in whether they disclosed details of research participation to bereaved relatives.

**Conclusion:** Critical care research could benefit from research ethics committees having expertise in consent processes that are suited to this setting, better staffing at research sites, more extensive patient-public involvement and an evidence base on stakeholder perspectives on critical care research processes. Guidance on professional consultee processes, telephoning relatives to discuss research, research without prior consent and disclosure of research participation to bereaved

1  
2  
3 relatives could help to harmonise practice in these areas and enhance recruitment and consent to  
4 critical care studies.  
5

6  
7 **Key Words:** critical care, consent, recruitment, qualitative methods  
8

9  
10 **Strengths and limitations**

- 11 • The study includes the views of UK-based researchers and PPI contributors to explore the  
12 problems that research teams encounter in recruiting and consenting to ICU studies
- 13 • A sample of just 8 PPI contributors limits the scope of perspectives included in this study,  
14 though does reflect researchers' reliance on a small pool in their studies.
- 15 • Most of the studies discussed at interview were interventional and there may be distinct  
16 issues in recruiting and consenting to observational ICU studies that our findings do not  
17 cover.
- 18 • We focused on UK based participants, so generalisability of findings to other contexts may  
19 be limited.  
20  
21  
22

23  
24 **INTRODUCTION**  
25

26  
27 Clinical research in intensive care units (ICUs) is essential for improving care and treatments for  
28 critically ill patients. However, patients often lack decisional capacity at the point when they are  
29 recruited to critical care studies and the 'gold standard model' of consent, where an autonomous  
30 patient makes an informed decision about whether to take part in research, is not applicable.<sup>1 2</sup> To  
31 make sure patients can benefit from the improvements to care that research brings, regulations  
32 have been developed in many countries to permit enrolment of incapacitated patients.<sup>3-5</sup> These aim  
33 to balance the rights of these patients with the need for research in ICUs and other settings where  
34 patients do not have capacity.<sup>6</sup> Box 1 below summarises the regulations governing recruitment and  
35 consent of incapacitated patients to research in England and Wales, as outlined by the Health  
36 Research Authority (HRA), while variants of these requirements apply in Scotland and Northern  
37 Ireland.  
38  
39  
40

41  
42 Despite regulations permitting recruitment of incapacitated patients to studies, successfully  
43 implementing research and recruiting patients in critical care settings can be challenging. A review  
44 by Schandelmaier and colleagues<sup>7</sup> found that trials in emergency care and ICUs are four times more  
45 likely to be prematurely discontinued due to slow patient recruitment compared to trials outside  
46 these settings. In addition to the recruitment barriers that are widely reported in many specialties,<sup>8-</sup>  
47 <sup>11</sup> critical care trials face numerous specific challenges. <sup>7 12</sup> Several of these challenges arise from the  
48 time sensitive nature of treatments in this setting, with necessarily short time windows for  
49 recruitment of patients for many studies. Recruitment often takes place out of hours, when staffing  
50 and other resourcing may not be adequate to support research demands, and family members are  
51 often not available or able to act as substitute decision makers. However, Schandelmaier and  
52 colleagues noted that studies in their review rarely reported detailed reasons for recruitment  
53 problems.  
54  
55  
56  
57  
58

59 To better understand the challenges in recruiting and consenting incapacitated patients to research  
60

in critical care settings, we conducted in-depth qualitative interviews with critical care research staff in the UK. As we were particularly interested in understanding the interface between the legal frameworks around consent processes and the practicalities of implementing recruitment to ICU studies, interviews explored what influenced researchers when designing recruitment and consent processes, as well as their experience of recruiting to studies. Our overall goal was to identify ways that recruitment and consent could be enhanced in ICU studies. To ensure studies are designed and implemented in ways that are patient-centred, researchers in a growing number of countries are now expected to involve patients and the public when designing and implementing studies.<sup>13-19</sup> Therefore, we also interviewed people who had been patient-public involvement (PPI) contributors on ICU studies in addition to interviewing critical care researchers.

**Box 1: Overview of approaches to recruitment and consent seeking with incapacitated patients in England and Wales\* by study type**

**i) Clinical trials of investigational medicinal products (CTIMPs)**

***CTIMPs in non-emergency situations***

Investigators can seek prospective consent from an incapacitated patient's legally designated personal representatives. Personal representatives are personally known to the patient, such as a family member or a close friend. However, if there is no representative, they are not available or they are unwilling to act (i.e. you can't contact them or they don't want to make that decision) a doctor who is independent of the study can act as a legally designated professional representative, and approve a patient's recruitment to a trial in certain circumstances. Researchers will usually seek consent (e.g. for continued participation and further disclosure of confidential information) from the patient, if and when they regain capacity.

***CTIMPs in emergency situations***

When investigating treatments that must be administered urgently and it is not reasonably practicable to obtain consent from a legally designated representative, patients can be recruited into a trial without prior consent. This is known as research without prior consent (RWPC). As patients recruited under this process may regain capacity to give consent, researchers are required to plan how they will involve patients in the on-going consent process. Trial participation and any relevant consent required (e.g. consent for continued participation and disclosure of confidential information) should be discussed with legally designated representative, or patient if they regain capacity, as soon as possible after the patient's recruitment to the trial.

**ii) Other study types (non-CTIMPS)**

Other study types are those that involve the processing of personal data, administration of interviews or observations, and clinical trials that are not CTIMPs.

***Other types of study in non-emergency situations***

Before a patient is recruited to such a study, investigators are required to seek advice from the patient's personal consultee, usually a family member, about the patient's likely wishes. If investigators are unable to identify a personal consultee they can consult with a nominated consultee, which is usually a doctor responsible for the patient's care who has no connection to the research. When a patient recruited under a consultee process subsequently regains capacity, study participation should be discussed.

#### ***Other types of study in emergency situations***

Patients can be recruited without prior advice from a consultee, provided it is not reasonably practicable to seek such advice in advance. Investigators need to seek agreement of a registered medical practitioner who is not involved in the organization or conduct of the study - unless there is insufficient time to obtain that agreement. The consultee's advice should be sought on the participant's likely views and feelings about the study as soon as possible after recruitment. If objections are raised, the patient must be withdrawn unless doing so would pose a risk to the participant's health. When a patient recruited under a consultee process subsequently regains capacity, study participation should be discussed.

\*Adapted from the UK Health Research Authority website with reference to relevant legislation.<sup>20-22</sup>

## **METHODS**

### **Overview**

Interviews were conducted between late 2016 and mid-2017 as one workstream within the wider mixed-methods Perspectives study. The Perspectives study sought to develop good practice guidance on recruitment and consent processes for ICU studies. Given these pragmatic aims, the study was broadly critical realist in approach.

The University of Liverpool provided ethical approval (reference 0465) for this workstream of Perspectives.

### **Patient and public involvement**

This study included two PPI contributors, who were not specifically involved in this workstream.

### **Sampling and recruitment**

We sampled UK researchers who had experience of designing or conducting ICU studies by searching the National Institute for Health Research (NIHR) research portfolio, trial registries and snowball sampling via critical care researchers and networks. Researchers were eligible if they had been involved in critical care studies which had included at least one UK centre and was in set up, ongoing, or had been published within the previous two years. We sent researchers an invitation email outlining the Perspectives study and attached a participant information sheet with further details.



1  
2  
3  
4 PPI contributors were eligible if they had been research partners, steering group members or  
5 advisors on ICU studies. We initially identified them by asking interviewed researchers to email PPI  
6 contributors who they had recently worked with. Researchers sent PPI contributors an invitation  
7 email and a participant information sheet. We identified relatively few PPI contributors via this  
8 route, at least in part because research teams often seemed to rely on the same few PPI  
9 contributors for multiple studies. Therefore, we also placed an advertisement for potential PPI  
10 participants in a newsletter that ICUsteps, a UK charity for ICU patients and families,<sup>23</sup> circulated to  
11 their members.  
12  
13  
14

15  
16 KP contacted researchers and PPI contributors who replied to the invitation, further explaining the  
17 study and arranging the interviews. Sampling of participants aimed for data saturation, the point at  
18 which further interviews no longer add to the analysis.<sup>24</sup>  
19  
20

## 21 Interviews

22 The interviews were conducted by KP, a post-doctoral research psychologist with experience in  
23 qualitative methods. Interviews were semi-structured to ensure key topics were explored, whilst  
24 also conversational to enable participants to raise previously unanticipated issues. To avoid idealised  
25 responses, interviews focused on specific studies that participants had been involved with. The  
26 interview topic guide (Box 2) was initially informed by published literature and the research team's  
27 experience in this area and then developed iteratively over the course of interviewing. As  
28 participants were located throughout the UK, interviews were conducted via telephone. Participants  
29 gave informed consent before being interviewed and PPI contributors were offered a £25 shopping  
30 voucher to acknowledge their contribution to the study.  
31  
32  
33  
34

### 35 Box 2: Summary of topic guides for researchers and PPI contributors

36  
37  
38 *Interviews with researchers explored their accounts of:*

- 39 • ethical, regulatory, scientific and pragmatic considerations that guided decision-making about
- 40 the design of recruitment and consent methods in their studies;
- 41 • experiences of seeking ethical approval and feedback from research ethics committees;
- 42 • experiences of implementing different recruitment and consent processes, including the
- 43 timing of recruitment, consultation and consent seeking, involvement of different staff in this
- 44 process;
- 45 • perceived barriers to implementing recruitment and consent as planned;
- 46 • suggestions for improving recruitment and consent processes.

47  
48  
49  
50  
51 *Interviews with PPI contributors explored their accounts of:*

- 52 • recruitment and consent processes in ICU studies they had been involved with;
  - 53 • awareness of considerations that had informed recruitment and consent processes;
  - 54 • opinions of these recruitment and consent processes;
  - 55 • awareness of any problems that arose during the studies;
  - 56 • suggestions for improving recruitment and consent processes.
- 57  
58  
59  
60

## Analysis

Transcripts of audio-recorded interviews were checked for accuracy and pseudo-anonymised prior to analysis. KP led the analysis in close consultation with BY (a psychologist and qualitative methodologist); both read all transcripts multiple times. Analysis was broadly interpretive and informed by the literature on quality and rigour in qualitative research.<sup>25</sup> We drew on thematic approaches<sup>26</sup> but conducted the analysis at multiple levels, from line by line coding, to consideration of participants' narratives at a holistic level in order to ensure coherence and contextualisation. The developing analysis was discussed with wider members of the study team, which included individuals with expertise in qualitative methods, bioethics, critical care, and clinical trials. We used NVivo software to assist with indexing and coding the data.

To evidence our interpretations we present data excerpts, denoting researchers with an R before their identification code and PPI contributors with P.

## RESULTS

### Participant and interview characteristics

We invited 26 researchers and interviewed 17 (65%); the remaining nine researchers did not respond to invitation emails. Of the 17 interviewed researchers (10 male, 7 female), 10 were consultants and one was a specialist registrar in intensive care medicine. The remaining six had backgrounds in academic research, clinical trial management or nursing in intensive care settings. Eight had 15 or more years' experience in critical care research, seven had between 5-14 years and two had less than 4 years critical care research experience. We interviewed eight PPI contributors; as we recruited PPI contributors via participating researchers and an advertisement, we are unable to report how many received invitations but did not respond. Of the 8 PPI contributors (6 male, 2 female), all except 2 reported that they had lived experience of ICU care as a patient, relative or both.

Interviews usually lasted between 45-60 minutes. A total of 33 ICU studies were discussed (4 observational, 29 interventional), although some PPI contributors had difficulty remembering details of the studies they were involved in.

### Qualitative findings

In presenting the findings, we turn first to participants' accounts of the design of recruitment and consent processes, before presenting their perspectives on the practical implementation of these processes in studies. We note that the terminology used by participants often differed to that used in guidance and regulations. For brevity and reflecting the terminology of participants, we use the term *consultee* to refer to substitute decision makers in both CTIMPS and non-CTIMPS.

### Designing recruitment and consent processes

***Designing consent processes was felt to be straightforward but often lacked patient-public involvement***

1  
2  
3 Unsurprisingly, researchers spoke of regulatory requirements as an important influence on the  
4 design of their studies. Some specifically mentioned following a three tier consent “*hierarchy*” (R20)  
5 in which informed consent from patients was regarded as the most acceptable process, with  
6 consultation with a personal consultee as intermediate, and use of professional consultees reserved  
7 for instances when patient informed consent and a personal consultee process were not possible.  
8  
9

10  
11 *“The hierarchy is, er, patient consent, if patient consent is not possible then declaration by a*  
12 *personal consultee. If the personal consultee is either not available or it’s not appropriate to*  
13 *consult them, it’s a declaration by a nominated [professional] consultee... a critical care*  
14 *consultant who is not immediately, who is not involved in the research study and is not*  
15 *immediately involved in the care of the patient”* (R20).  
16  
17

18  
19 Beyond this hierarchy researchers commented that the design of the recruitment and consent  
20 processes was relatively straightforward and largely determined by study type and the overall  
21 research aims, “*it’s dictated by what the study is and what you’re err trying to demonstrate*” (R11).  
22 They carried forward processes that they had used in previous studies “*we just really used the same*  
23 *process for the second study, it was, you know, pretty much accepted*” (R15), and emphasised the  
24 many years of ICU clinical and research experience that they and their teams had to draw on when  
25 designing recruitment and consent processes.  
26  
27

28  
29 Several researchers described having consulted with PPI contributors about their studies. A few  
30 believed that PPI contributors had an important role in informing consent processes. For example,  
31 R19 commented that PPI contributors had influenced their research team’s decision to take a  
32 “*proportionate*” approach to the consent process in their study of using a professional consultee  
33 process when relatives were unavailable or speaking with them would pose an “*unnecessary or*  
34 *excessive burden on relatives at a difficult time.*” However, most researchers indicated that  
35 consultation with PPI contributors had largely involved them commenting on study patient  
36 information materials rather than directly informing the design of recruitment and consent  
37 processes. While one researcher said that PPI input “*wasn’t necessary*” (R11), more commonly  
38 researchers believed PPI input to the design of recruitment and consent processes was limited  
39 because “*you needed to be a clinician to understand the parameters*” (R13).  
40  
41  
42  
43

44  
45 Echoing the accounts of researchers, PPI contributors mostly described having limited input to the  
46 design of recruitment and consent processes with their roles largely being to comment on patient  
47 and family information materials and attend study steering group meetings. Also echoing the  
48 accounts of some researchers, several PPI contributors commented that their input was limited by  
49 their lack of clinical knowledge. However, some also linked their limited input to how research teams  
50 implemented PPI. For example, PPI being sought after the design of studies was largely settled,  
51 studies only having one PPI member, and a lack of support and training for PPI contributors, “*there’s*  
52 *no training for PPI... it can be a very daunting environment for someone who is perhaps retired and*  
53 *has come from a relatively “normal” background*” (P25). One PPI contributor also commented that  
54 some critical care researchers were “*half-hearted*” (P6) about PPI and did not use it to its full  
55 potential.  
56  
57  
58  
59

60 ***Anticipated challenges of gaining ethics approval influenced the design of some studies***

1  
2  
3 Researchers' experiences of preparing for and gaining research ethics committee (REC) approval for  
4 their studies were mixed. Some indicated that gaining REC approval was "very straightforward"  
5 (R11). This included several researchers who had obtained approval to use substitute decision  
6 makers in their studies. Outlining the REC's rationale for approving enrolment to their study via a  
7 "declaration by a nominated consultee" where necessary, R20 explained:  
8  
9

10  
11 *"The reason the ethics committee agreed... we were keen to have a blood test on the day of*  
12 *severe acute [name of condition] and... they also accepted that the relatives are not always*  
13 *available and even if they are available, they may be too distressed"* (R20).  
14  
15

16 Some researchers commented that they and their study teams had become adept in understanding  
17 what ethics committees would or would not approve. One described having "built up a relationship"  
18 (R7) with a REC and working in a mutual learning cycle, whereby the REC gained experience in  
19 reviewing studies involving incapacitated patients, whilst their research team used the REC's  
20 feedback over numerous previous studies to cumulatively fine tune their processes and patient  
21 materials for new applications. Similarly, another researcher spoke of selecting RECs who were  
22 experienced in dealing with ICU studies and avoiding ones without such experience: "if you have a  
23 difficulty it's because you've gone to the wrong REC" (R18). The feedback such researchers received  
24 from RECs on their applications largely amounted to minor revisions to patient information  
25 materials.  
26  
27  
28  
29

30 Others described the challenges they had encountered in gaining approval for their studies. These  
31 researchers felt RECs were "negative" (R11) and described instances of RECs refusing to approve  
32 consent processes that were commonplace in ICU studies:  
33  
34

35 *"Making you justify, endlessly, why, in an incapacitated patient, you can't take a form of*  
36 *consent. It's like an uphill battle... Despite going and justifying the rationale, they tend to just*  
37 *come back and say 'no, we don't want you to do that, we want you to take written consent*  
38 *or we want you to try without telephone consent and if you're struggling to recruit, come*  
39 *back to us and then we'll give you, then we might give you telephone consent"* (R4).  
40  
41  
42

43 Commenting on the narrow time windows of many ICU studies, several researchers were interested  
44 in whether research without prior consent (RWPC) would help to address such challenges. However,  
45 one researcher described having been denied REC permission for RWPC in their study, while others  
46 commented that they had anticipated problems in ethical gaining approval for RWPC<sup>1</sup> and so had *a*  
47 *priori* ruled out RWPC when developing their funding and ethics applications. R8 explained the  
48 potential implications for investigating the efficacy of the time sensitive study intervention in their  
49 study:  
50  
51  
52

53 *"If therapies aren't started within a specific, um, time window... their potential, um, efficacy*  
54 *might be lost... we're currently trying to get a sedation study funded and we think that using*  
55  
56  
57

---

58 <sup>1</sup> Several interviewees used terms such as "deferred consent" or "emergency provision" to  
59 refer to RWPC.  
60

1  
2  
3 *it very early is likely to be beneficial but we're probably going to, um, compromise that*  
4 *because we know we won't be able to get consent quickly enough if we don't get, um,*  
5 *deferred consent" (R8).*  
6  
7

8 Similarly, R1 attributed their team's previous decision not to seek REC approval for RWPC in a study  
9 to the difficulty of justifying the use of RWPC. R1 linked this difficulty to a lack of evidence on  
10 stakeholder perspectives on RWPC at the time the team were designing the study, and noted that  
11 evidence of stakeholders' perspectives on RWPC had since been published in the context of  
12 paediatric emergency and critical care studies.  
13  
14

15  
16 *"We just couldn't see how we could quite justify it [RWPC], but I think we might have had a*  
17 *go at justifying it by using a lot of the other work that's going on at the moment, especially*  
18 *through some of [name of researcher]'s stuff... I would have been a bit braver" (R1).*  
19  
20

21 Without recourse to RWPC, R1 suggested that their study was *"delaying treatment essentially"* and  
22 elaborated on the concerns this raised: *"my main worry.... in the real world you would be starting*  
23 *that protocol at the point of when they've met the eligibility criteria... rather than an hour and a half*  
24 *later" (R1).* Speaking of the *"lack of clarity"* regarding RWPC as a *"major, major challenge for critical*  
25 *care research"*, R4 pointed to differences in attitudes towards RWPC between the HRA (the national  
26 authority in the UK that oversees governance in healthcare research), and individual ethics  
27 committees:  
28  
29

30  
31 *"The people at the top were very clearly saying if the [consent] process is delaying when you*  
32 *feel this biological plausibility of the intervention should occur, you should be going to the*  
33 *ethics committee and saying, I need to have emergency provision because of that, whereas*  
34 *my experience is when you go to individual ethics committees, that that's not the view a lot*  
35 *of them take" (R4).*  
36  
37  
38

39 Despite these and other challenges, few researchers commented on input from PPI contributors as  
40 being relevant on such issues when seeking REC approval, although some did comment in more  
41 general terms about PPI input being helpful in discussions with ethics committees:  
42  
43

44 *"Make sure that there are some PPIs to feed into... that also creates very sort of strong basis*  
45 *for discussions with the ethics committee... otherwise you go into these things without sort of*  
46 *a leg to stand on if they don't feel it's the right, but if you've been able to discuss it with the*  
47 *ethics committee based on feedback from patients... it makes it a lot stronger" (R1).*  
48  
49  
50

51 Again, concurring with the accounts of most researchers, the PPI contributors we interviewed  
52 commented that they had provided little or no input to the REC applications for the ICU studies that  
53 they were involved with.  
54

## 55 **Implementing recruitment and consent processes**

### 56 ***Need for alternatives to prospective informed consent from patients***

57  
58  
59  
60

1  
2  
3 In their accounts of implementing research, almost all researchers and several PPI contributors  
4 emphasised the difficulty of obtaining prospective informed consent from patients in the ICU, and  
5 the need for substitute decision makers. Recruiting patients was often a “24/7” (R4) activity and  
6 patient eligibility for a study could change rapidly, yet staff support for research was costly and  
7 usually only available during office hours. Moreover, as both PPI contributors and researchers  
8 commented, much critical care research was time critical and study recruitment windows often did  
9 not coincide with relatives being present to act as personal consultees.  
10  
11

12  
13 *“Things can happen so fast and... well if the relative's gone home and suddenly there's been a*  
14 *deterioration or there's, you know, where they think hang on a minute... do we want to get*  
15 *them on to the study. Well you could be waiting six hours for the relative to come back in”*  
16 *(P21).*  
17  
18

19  
20 *“You're having to do this time sensitive, face to face with the relative at an appropriate*  
21 *time... then 24/7 recruitment is really challenging because it's very difficult to staff your ICU*  
22 *seven days a week... into the evenings... the cost of staffing you're doing is very high” (R4).*  
23  
24

25 While emphasising the need for substitute decision makers, some researchers worried that  
26 regulation permitting such consent was precarious and spoke of the potential for future changes  
27 that could, for example, restrict the use of substitute decision-makers and make ICU research “*even*  
28 *more difficult to undertake” (R13), be “disastrous for critical care, um, because it just, it would, it*  
29 *would preclude research really” (R12).*  
30  
31

### 32 **Challenges of using personal consultees**

33 Both researchers and PPI contributors described the complexities of approaching family members to  
34 act as personal consultees when patients were incapacitated. They emphasised that family members  
35 are in a “*frantic state*” (R2) when patients are critically ill with feeling of anxiety going “*through the*  
36 *roof*” (P21) and the difficulties families would have in taking in information and making a decision  
37 about a study. In this context, PPI contributors spoke of the need for researchers to be “*very gentle*”  
38 (P9) when approaching families, while researchers spoke of their strong urge not to add to the  
39 families’ distress and of the tensions appropriately timing the approach to families when studies  
40 often required consultation with family members very soon after a patient’s admission to ICU and  
41 “*there's a lot of anxiety from the relatives*” (R11). They also described family members as sometimes  
42 being reluctant to make decisions about research on behalf of the patient and as “*much more risk*  
43 *averse...than they [patients] would've been for themselves*” (R15). When a patient had multiple  
44 family members, difficulties could also arise in establishing who should act as a patient’s personal  
45 consultee and sometimes family members could not agree about whether a patient should be  
46 recruited. Several researchers also spoke of the complexities of contacting families by telephone to  
47 discuss research. A few were reluctant to do so and one researcher indicated that their REC was  
48 reluctant to permit families being approached about research over the telephone. Such complexities  
49 led some researchers to question whether involving family members in decisions about research, in  
50 the hours after a patient’s admission, was necessarily superior to the use of professional consultees  
51 or RWPC.  
52  
53  
54  
55  
56  
57  
58  
59  
60



1  
2  
3  
4  
5  
6  
7  
8  
9  
10  
11  
12  
13  
14  
15  
16  
17  
18  
19  
20  
21  
22  
23  
24  
25  
26  
27  
28  
29  
30  
31  
32  
33  
34  
35  
36  
37  
38  
39  
40  
41  
42  
43  
44  
45  
46  
47  
48  
49  
50  
51  
52  
53  
54  
55  
56  
57  
58  
59  
60

*“Are we kidding ourselves that we’re doing some truly ethical process where actually, would it be best to just use [RWPC] and say you know, this has been through a whole load of checks and balances?” (R2).*

*“I feel that it's more ethic, it's more ethical to use the professional consent and to gain consent from relatives when they are in the, you know, when they are kind of feeling more comfortable and less panicky about what's happened to their relatives” (R13).*

### **Challenges of using professional consultees**

In contrast, a few researchers were uneasy about the use of professional consultees for other reasons. Indeed, one spoke of making strenuous efforts to “avoid” this process, noting concerns about how it might be perceived “externally” (R3):

*“You can see how it could be externally perceived that the consultant who signs as the professional consultee could seem to have a conflict of interest with regards to not upsetting his colleague who is the investigator... We've always usually, by hook or by crook, been able to identify a personal consultee” (R3).*

Other researchers spoke about whether to “go to a professional legal representative versus wait for the relatives” as “a grey area” (R4). They varied in how they managed this, with some tending to reserve professional consultees for situations where family members could not be traced within a given period.

*“Where we know there's a next of kin but they can't come up face to face. And in that setting we would lose the patient 'cause we generally only use a professional where there are, is no next of kin at all or we're not aware of any next of kin following a, um, detailed search” (R8).*

A few researchers described more flexible processes in which they extended use of professional consultees to situations where it was considered burdensome or unfeasible to ask families to make a decision.

*“If it looks like the family are going to come in then we'll wait for them and talk to them. But if it's going to be not feasible, or there is some reason why it would be very last minute to talk to them, and, you know, disproportionate or unfair on them, then we have an ability to take the professional advice” (R19).*

R19 added that they reserved the use of professional consultees only for studies that involved treatments already in widespread clinical use, whereas for studies involving more novel treatments the patient would not be recruited without first speaking to the family. A variant on the above process involved researchers contacting the family members in advance of a patient’s recruitment to inform them of a plan to recruit the patient to a study under a professional consultee process. R19 and R15 referred to using this process, albeit with some unease on R15’s part:

1  
2  
3 *"If the relative was in Australia for instance we would tell them about the trial, see if they*  
4 *had any objections, and then we would get professional consent...but I just felt a lot more*  
5 *comfortable if I could catch the relatives"* (R15).  
6  
7

8  
9  
10  
11  
12  
13  
14  
15  
16  
17  
18  
19  
20  
21  
22  
23  
24  
25  
26  
27  
28  
29  
30  
31  
32  
33  
34  
35  
36  
37  
38  
39  
40  
41  
42  
43  
44  
45  
46  
47  
48  
49  
50  
51  
52  
53  
54  
55  
56  
57  
58  
59  
60  
Regardless of the different perspectives and arrangements surrounding the use of professional consultees, some researchers commented that family members were generally accepting of this process when told about it 'after the event', often readily endorsing the patient's continued participation in a study. *"If you'd obtained a physician consent... then people are often very happy to say that's great, I don't have any objections to you carrying on. But if you ask them to give the consent then they would be reluctant to make a decision"* (R18).

Those PPI contributors who spoke about professional consultee processes felt that it was acceptable *"if the safeguards are all in place... I'm quite comfortable with that"* (P17), although several expressed some reluctance or attached caveats to their support. *"I'm just a little bit wary... you just need a couple of caveats of, in there about who it is doing it, and that they're sufficiently independent to actually take in the patient's best interests"* (P6).

### **Challenges of seeking consent from patients after they regain capacity**

For patients who regain capacity after being recruited to studies under a personal or professional consultee process, it is a requirement for researchers to seek the patient's consent. However, as researchers remarked, patients *"may appear to have capacity"* (R4) but this could fluctuate rapidly, and they could have an array of sometimes subtle physical, cognitive and emotional difficulties influencing their capacity. As R13 noted: *"they're not critically ill but... they're still nowhere near 100% and I'm not sure they've got real energy to think about [research]"*. PPI contributors echoed these comments:

*"If I've just been woken up from a ventilator or sedation or I'm going into high dependency from ICU do I really want papers, documents, people coming to me and talking about the study and wanting my signature"* (P24)

Therefore, judging when a patient could be approached about a study was challenging: *"the ability of the research staff, even if they're very experienced, to assess that is also very, very difficult"* (R4) and often involved researchers returning to assess a patient several times:

*"Consenting I would say is one of the most time-consuming things that the research nurses do. So they'll often have to go back and see people, either on the ICU or in the ward, three, four, maybe five times before people actually regain capacity and they can actually consent them"* (R11).

Complexities could also arise if samples or other study procedures were required soon after a patient had started to regain consciousness: *"once a patient is awake and kind of aware then you can't really approach them for a study procedure without telling them about the study... they're just realising how sick they were... it's just all too much"* (R18).

### **Challenges when a patient dies**



1  
2  
3 With mortality rates in ICUs of around 25%, some patients recruited to studies will not survive their  
4 illness. Where patients recruited to studies under a professional consultee process subsequently die,  
5 bereaved family members may be unaware that their deceased relative participated in a study.<sup>9</sup>  
6 Researchers who had encountered this issue varied in their accounts of how they managed it. One  
7 indicated that their practice was to inform bereaved relatives about the patient's participation and  
8 ask them whether they wished the patient's data to be retained in the study:  
9  
10

11  
12 *"By the time you've got to the relatives the patient has already died, then you would.... tell*  
13 *them that before [the patient] died they were put in a study, and, er, that [the family*  
14 *members] just need to be aware of that... you've obtained professional consent then you*  
15 *would give the relatives the option to say 'do you wish the data to be used or not used?'"*  
16 *(R18).*  
17  
18

19  
20 In contrast, R4 did not discuss the research with bereaved relatives and referred to published  
21 guidance to support their team's practice:  
22

23  
24 *"In England, under the professional legal representative... our understanding from the*  
25 *guidance we had was if the patient died and we didn't have any other form of consent or*  
26 *non-objection we could retain the patient in the study, because under the Mental Capacity*  
27 *Act, the professional legal representative was a valid form of documentation to include*  
28 *someone in a study" (R4).*  
29  
30

31  
32 In line with the advice from their PPI group, R19 similarly described their usual practice was not to  
33 inform bereaved relatives that the patient had taken part in a study, unless there were exceptional  
34 circumstances:  
35

36  
37 *"Our patient and public groups think that on the whole unless there's a particular reason why*  
38 *you need to tell the relatives, er, why something happened, they don't really want us*  
39 *approaching relatives of patients who've died... We do sometimes, but on average no, it's*  
40 *very study specific. If [...] a serious adverse event has occurred then we would, because*  
41 *we've got a duty to disclose" (R19).*  
42  
43

44  
45 While perspectives on this issue varied, researchers agreed that further guidance was needed on  
46 whether and how to disclose study enrolment and retention of data to families, when a patient  
47 recruited under a professional consultee process subsequently dies.  
48

49  
50 PPI contributors who spoke about this issue also varied in their opinions. One concurred with R4 and  
51 R19, commenting that it was not *"ethical to approach people who are grieving in that way"* (P23).  
52 Another acknowledged the considerable difficulties involved but was doubtful whether these  
53 justified *"withholding"* information about a patient's research participation from bereaved family  
54 members *"ethically that seems even more, er, wrong to not be able to give people that information.*  
55 *So, um, so I don't know"* (P6).  
56  
57

## 58 DISCUSSION

59  
60

1  
2  
3 Our findings illuminate some of the difficulties that underlie previously reported problems in  
4 successfully recruiting to ICU studies. Reflecting the regulations governing research, participants  
5 regarded informed consent by the patient as the most acceptable form of consent but emphasised  
6 that it was impossible to seek such consent when patients lacked decisional capacity. As others have  
7 similarly found,<sup>27 28</sup> researchers reported variation in how RECs responded to their proposed consent  
8 processes, with a few reporting that some RECs were reluctant to approve consent processes that  
9 were commonly used in ICU studies. These findings point to the continued importance of ensuring  
10 RECs that review ICU studies having relevant expertise and understanding of recruitment and  
11 consent for ICU studies. For ICU studies with very narrow recruitment time windows, researchers  
12 spoke about the potential benefits of RWPC. A few had considered RWPC for their studies, but felt  
13 that RECs would not approve this process so they did not pursue it. Researchers wanted further  
14 guidance from RECs on the use of RWPC to ensure studies appropriately balanced both ethical and  
15 scientific considerations. Box 3 below summarises these and other factors that could benefit  
16 recruitment to ICU studies.

17  
18  
19  
20  
21  
22 The accounts of both researchers and PPI contributors indicated that PPI activity was largely limited  
23 to the development of study information materials for patients and families. Researchers who  
24 involved PPI contributors more broadly pointed to the value of their input, particularly in helping to  
25 resolve questions about consent processes, such as the use of professional consultees and the  
26 disclosure of study enrolment to bereaved families. This echoes findings from other research  
27 contexts where PPI was found to be helpful in addressing various challenges and ensuring research  
28 was acceptable and relevant to patients.<sup>28 29 30</sup> Extending PPI beyond the development of study  
29 information materials to the design, planning and implementation of studies could benefit critical  
30 care research, although PPI contributors would need support and training to help them feel  
31 confident in commenting on ICU study consent processes. We have developed an accessible  
32 animation that could help as part of such training.<sup>31</sup>

33  
34  
35  
36  
37  
38 In describing the implementation of recruitment and consent processes, researchers and PPI  
39 contributors were clear that recruiting patients would benefit from improved staffing and  
40 resourcing, as others have previously reported<sup>12</sup>. Researchers were also concerned to avoid adding  
41 to the distress of families when recruiting to studies, but family members often had to be  
42 approached about research during or soon after a patient's admission to ICU. Some researchers  
43 described deliberating over when to use personal or professional consultees in such situations;  
44 where studies involved interventions that were well understood or had particularly tight timescales,  
45 a few described using professional consultees rather than personal consultees to avoid distressing  
46 families. Others regarded the use of professional consultees as questionable and avoided it  
47 altogether. Accounts also differed on the acceptability of approaching families by telephone to  
48 discuss research. Our findings resemble those from other contexts<sup>32 33 34</sup> in pointing to the  
49 uncertainties and dilemmas that some researchers experience in recruiting to studies, and to how  
50 researchers can gain confidence in recruiting and consenting to studies from knowing that the  
51 perspectives of patients and families have informed study protocols. There are also indications that  
52 the use of telephone consent in the UK has increased in response to the COVID-19 pandemic, given  
53 the restrictions in hospital visiting rules and risk of infection<sup>35</sup>. Including specific advice in study  
54 protocols on issues such as the use professional consultees and approaching families by telephone  
55 to discuss research, informed by evidence on the perspectives of patients and other stakeholders  
56  
57  
58  
59  
60

and co-produced with PPI contributors, could help to address remaining uncertainty in these areas and potentially help to avoid non-recruitment of eligible patients.

Variations were also evident when participants spoke about situations where a patient had been recruited to a study under a professional consultee process and the patient later died before the family had been informed about the study. Researchers wanted further guidance on whether to disclose to bereaved family members that their relative had been recruited to a study. Including specific advice on this in study protocols informed by evidence on families' perspectives and co-developed with PPI contributors could inform management of this sensitive issue. Such an approach has been useful in addressing methodological challenges in organ donation research<sup>36</sup>, while research evidence on stakeholders' perspectives has been pivotal in informing guidance on bereavement in the context of the critical care studies involving children.<sup>37-39</sup> Evidence on the perspectives of patients, relatives and staff regarding consent processes in adult critical care studies has been collected as part of the wider Perspectives study and could be similarly informative on this and other issues.

### Box 3: Factors that could benefit recruitment and consent to ICU studies

- Ensuring that RECs which review ICU studies have relevant expertise and understanding of recruitment and consent for studies involving incapacitated patients within narrow time windows
- Widening the scope of PPI in ICU studies and supporting PPI contributors to feel confident in contributing to the design of recruitment and consent processes
- Better staffing for recruiting patients
- Evidence on the perspectives of patients, relatives and staff regarding recruitment and consent processes in adult critical care studies
- Guidance on:
  - Requirements for ethical approval of RWPC
  - Circumstances in which to use a professional consent/consultee process
  - Use of telephone or videoconferencing to discuss research with relatives
  - Whether bereaved relatives should be informed of the patient's research participation

Our study has some limitations. First, despite trying different ways to access PPI contributors with experience of ICU studies we interviewed fewer than anticipated, at least in part because researchers tended to rely on a small pool of PPI contributors for their studies. It is possible that the perspectives of the PPI contributors who we interviewed do not reflect the breadth of PPI in ICU studies. Nevertheless, most researchers similarly described that the scope of PPI in ICU studies was limited. Second, interviews took place between late 2016 to mid-2017 and PPI input to ICU studies may have expanded since. Third, most of the studies discussed in the interviews were interventional and there may be distinct issues in recruiting and consenting to observational ICU studies that our findings do not cover. Finally, all participants were UK based. Cultural, legal and practice differences between countries means that caution is needed in transferring the findings to other countries.

1  
2  
3 In conclusion, this study offers insights on the problems that research teams encounter in recruiting  
4 and consenting to ICU studies and ways these could potentially be overcome. Our findings indicate  
5 that the critical care research could benefit from further support and guidance in the areas  
6 summarised in Box 3 above. Widening the scope of PPI in ICU studies and using evidence on the  
7 perspectives of patients and relatives to inform recruitment and consent to studies may be  
8 particularly important. Insights from these can help to ensure that protocols and guidance are  
9 patient centred, as well as help research teams to feel more confident in recruiting and consenting  
10 to studies.  
11  
12  
13  
14  
15

### 16 **Acknowledgements**

17 The authors are grateful to the researchers and PPI contributors who participated in the interviews.  
18 We are also grateful to the Perspectives Study Advisory group. Details of how to access the study  
19 materials and data are available via the UK Data Service ReShare repository  
20 (<https://reshare.ukdataservice.ac.uk/>).  
21  
22

### 23 **Authors' contributions**

24 BY, KW, LF, CG and IW designed the Perspectives study. KP conducted the interviews and led the  
25 data analysis in close collaboration with BY. BY led on drafting the manuscript in close collaboration  
26 with KP. KW, LF, CG, IW and MW contributed to further drafts of the manuscript. All authors have  
27 read and approved the manuscript.  
28  
29  
30

### 31 **Funding**

32 This work was supported by the UK Economic and Social Research Council (grant number  
33 ES/N006372/1).  
34  
35  
36

### 37 **Competing interests**

38 None declared.  
39  
40

### 41 **References**

- 42  
43  
44 1. Gillett GR. Intensive care unit research ethics and trials on unconscious patients.  
45 *Anaesthesia and intensive care* 2015;43(3):309-12. doi:  
46 10.1177/0310057x1504300304 [published Online First: 2015/05/07]  
47  
48 2. Shepherd V. Advances and challenges in conducting ethical trials involving populations  
49 lacking capacity to consent: A decade in review. *Contemporary clinical trials*  
50 2020;95:106054. doi: 10.1016/j.cct.2020.106054 [published Online First:  
51 2020/06/12]  
52  
53 3. Jackson CN, Liaw P, Bagshaw S, et al. Data initiatives supporting critical care research and  
54 quality improvement in Canada: an environmental scan and narrative review.  
55 *Canadian journal of anaesthesia/ Journal canadien d'anesthesie* 2020  
56  
57 4. Furyk JS, Lawton LD, Ting JY, et al. Informed consent in emergency care research: An  
58 oxymoron? *Emerg Med Australas* 2017;29(1):110-12.  
59  
60 5. Luce JM, Cook DJ, Martin TR, et al. The ethical conduct of clinical research involving  
critically ill patients in the United States and Canada: principles and

- 1  
2  
3 recommendations. *American journal of respiratory and critical care medicine*  
4 2004;170(12):1375.  
5  
6 6. Dickert NW, Miller FG. Involving patients in enrolment decisions for acute myocardial  
7 infarction trials. *BMJ* 2015;351:h3791. doi: 10.1136/bmj.h3791 [published Online  
8 First: 2015/08/01]  
9  
10 7. Schandelmaier S, Von Elm E, You JJ, et al. Premature discontinuation of randomized trials  
11 in critical and emergency care: a retrospective cohort study. *Crit Care Med*  
12 2016;44(1):130-37.  
13  
14 8. Briel M, Olu KK, von Elm E, et al. A systematic review of discontinued trials suggested that  
15 most reasons for recruitment failure were preventable. *Journal of Clinical*  
16 *Epidemiology* 2016;80:8-15. doi: 10.1016/j.jclinepi.2016.07.016  
17  
18 9. Unger JM, Vaidya R, Hershman DL, et al. Systematic Review and Meta-Analysis of the  
19 Magnitude of Structural, Clinical, and Physician and Patient Barriers to Cancer  
20 Clinical Trial Participation. *J Natl Cancer Inst* 2019;111(3):245-55. doi:  
21 10.1093/jnci/djy221 [published Online First: 2019/03/12]  
22  
23 10. van der Zande IS, van der Graaf R, Hooft L, et al. Facilitators and barriers to pregnant  
24 women's participation in research: a systematic review. *Women and Birth*  
25 2018;31(5):350-61.  
26  
27 11. Hughes-Morley A, Young B, Waheed W, et al. Factors affecting recruitment into  
28 depression trials: Systematic review, meta-synthesis and conceptual framework.  
29 *Journal of Affective Disorders* 2015;172:274-90. doi:  
30 <http://dx.doi.org/10.1016/j.jad.2014.10.005>  
31  
32 12. Pattison N, Arulkumaran N, Humphreys S, et al. Exploring obstacles to critical care trials  
33 in the UK: a qualitative investigation. *Journal of the Intensive Care Society*  
34 2017;18(1):36-46.  
35  
36 13. Frank L, Basch E, Selby JV. The PCORI perspective on patient-centered outcomes  
37 research. *JAMA* 2014;312(15):1513-14.  
38  
39 14. Staniszewska S, Denegri S, Matthews R, et al. Reviewing progress in public involvement  
40 in NIHR research: developing and implementing a new vision for the future. *BMJ*  
41 *open* 2018;8(7):e017124.  
42  
43 15. Impact of public involvement on ethical aspects of research: Health Research Authority /  
44 INVOLVE [Available from: [https://www.invo.org.uk/wp-](https://www.invo.org.uk/wp-content/uploads/2016/05/Impact-of-public-involvement-on-the-ethical-aspects-of-research-updated-2016.pdf)  
45 [content/uploads/2016/05/Impact-of-public-involvement-on-the-ethical-aspects-of-](https://www.invo.org.uk/wp-content/uploads/2016/05/Impact-of-public-involvement-on-the-ethical-aspects-of-research-updated-2016.pdf)  
46 [research-updated-2016.pdf](https://www.invo.org.uk/wp-content/uploads/2016/05/Impact-of-public-involvement-on-the-ethical-aspects-of-research-updated-2016.pdf) accessed 30/06/2020.  
47  
48 16. Strategy for patient-oriented research: patient engagement framework: Canadian  
49 Institutes of Health Research; 2014 [Available from: [https://cihr-](https://cihr-irsc.gc.ca/e/48413.html)  
50 [irsc.gc.ca/e/48413.html](https://cihr-irsc.gc.ca/e/48413.html) accessed 30/06/2020.  
51  
52 17. Statement on consumer and community involvement in health and medical research  
53 National Health and Medical Research Council and the Consumers Health Forum of  
54 Australia; 2016 [Available from: [https://www.nhmrc.gov.au/about-](https://www.nhmrc.gov.au/about-us/publications/statement-consumer-and-community-involvement-health-and-medical-research)  
55 [us/publications/statement-consumer-and-community-involvement-health-and-](https://www.nhmrc.gov.au/about-us/publications/statement-consumer-and-community-involvement-health-and-medical-research)  
56 [medical-research](https://www.nhmrc.gov.au/about-us/publications/statement-consumer-and-community-involvement-health-and-medical-research) accessed 30/06/2020.  
57  
58 18. Schilling I, Behrens H, Hugenschmidt C, et al. Patient involvement in clinical trials:  
59 motivation and expectations differ between patients and researchers involved in a  
60 trial on urinary tract infections. *Journal of Research Involvement and Engagement*  
2019;5(1):15.

19. Sacristán JA, Aguarón A, Avendaño-Solá C, et al. Patient involvement in clinical research: why, when, and how. *Patient Preference and Adherence* 2016;10:631.
20. Research in emergency settings: Health Research Authority [Available from: <https://www.hra.nhs.uk/planning-and-improving-research/policies-standards-legislation/research-emergency-settings/> accessed 30/06/2020.
21. Principles of consent: Adults not able to consent for themselves (England and Wales): Health Research Authority [Available from: <http://www.hra-decisiontools.org.uk/consent/principles-ALC-EnglandandWales.html> accessed 30/06/2020.
22. Mental Capacity Act: Health Research Authority [Available from: <https://www.hra.nhs.uk/planning-and-improving-research/policies-standards-legislation/mental-capacity-act/> accessed 30/06/2020.
23. ICUsteps [Available from: <https://www.icusteps.org/> accessed 30/06/2020].
24. Guest G, Bunce A, Johnson L. How many interviews are enough? An experiment with data saturation and variability. *Field Method* 2006;18(1):59-82.
25. Levitt HM, Motulsky SL, Wertz FJ, et al. Recommendations for designing and reviewing qualitative research in psychology: Promoting methodological integrity. *Qualitative psychology* 2017;4(1):2.
26. Braun V, Clarke V. Using thematic analysis in psychology. *Qualitative Research in Psychology* 2006;3(2):77-101. doi: 10.1191/1478088706qp063oa
27. Dixon-Woods M, Angell EL. Research involving adults who lack capacity: how have research ethics committees interpreted the requirements? *Journal of Medical Ethics* 2009;35(6):377-81. doi: 10.1136/jme.2008.027094 [published Online First: 2009/06/02]
28. Tridente A, Holloway PA, Hutton P, et al. Methodological challenges in European ethics approvals for a genetic epidemiology study in critically ill patients: the GenOSept experience. *BMC Medical Research Ethics* 2019;20(1):30.
29. Crocker JC, Ricci-Cabello I, Parker A, et al. Impact of patient and public involvement on enrolment and retention in clinical trials: systematic review and meta-analysis. *BMJ* 2018;363:k4738. doi: 10.1136/bmj.k4738 [published Online First: 2018/11/30]
30. Forsythe LP, Carman KL, Szydowski V, et al. Patient Engagement In Research: Early Findings From The Patient-Centered Outcomes Research Institute. *Health Aff (Millwood)* 2019;38(3):359-67. doi: 10.1377/hlthaff.2018.05067 [published Online First: 2019/03/05]
31. Research in the Intensive Care Unit: Perspectives Study Team 2019 [Available from: [https://www.youtube.com/watch?time\\_continue=2&v=6HOTEIv46ec&feature=emb\\_title](https://www.youtube.com/watch?time_continue=2&v=6HOTEIv46ec&feature=emb_title) accessed 30/06/2020.
32. Donovan JL, Paramasivan S, de Salis I, et al. Clear obstacles and hidden challenges: understanding recruiter perspectives in six pragmatic randomised controlled trials. *Trials* 2014;15(1):5.
33. Dudley L, Gamble C, Preston J, et al. What difference does patient and public involvement make and what are its pathways to impact? Qualitative study of patients and researchers from a cohort of randomised clinical trials. *PLoS One* 2015;10(6):e0128817.
34. Mann C, Chilcott S, Plumb K, et al. Reporting and appraising the context, process and impact of PPI on contributors, researchers and the trial during a randomised controlled trial-the 3D study. *Research Involvement and Engagement* 2018;4(1):15.



- 1  
2  
3 35. GenOMICC. (2020). GenOMICC study protocol version 2.4. Retrieved from  
4 <https://genomicc.org/>  
5  
6 36. Noyes J, Mclaughlin L, Morgan K, et al. Designing a co-productive study to overcome  
7 known methodological challenges in organ donation research with bereaved family  
8 members. *Health Expectations* 2019;22(4):824-35.  
9  
10 37. Woolfall K, Frith L, Gamble C, et al. How parents and practitioners experience research  
11 without prior consent (deferred consent) for emergency research involving children  
12 with life threatening conditions: a mixed method study. *BMJ Open* 2015;5(9)  
13  
14 38. Woolfall K, Frith L, Dawson A, et al. Fifteen-minute consultation: an evidence-based  
15 approach to research without prior consent (deferred consent) in neonatal and  
16 paediatric critical care trials. *Archives of Disease in Childhood-Education Practice*  
17 *Digest* 2016;101(1):49-53.  
18  
19 39. Picton A, Woolfall K, Lyttle MD, et al. Research without prior consent in paediatric  
20 emergency and critical care medicine. *Paediatrics and Child Health* 2020;30(2):74-78.  
21  
22  
23  
24  
25  
26  
27  
28  
29  
30  
31  
32  
33  
34  
35  
36  
37  
38  
39  
40  
41  
42  
43  
44  
45  
46  
47  
48  
49  
50  
51  
52  
53  
54  
55  
56  
57  
58  
59  
60

## Consolidated criteria for reporting qualitative studies (COREQ): 32-item checklist

Developed from:

Tong A, Sainsbury P, Craig J. Consolidated criteria for reporting qualitative research (COREQ): a 32-item checklist for interviews and focus groups. *International Journal for Quality in Health Care*. 2007. Volume 19, Number 6: pp. 349 – 357

| No. Item                                       | Guide questions/description                                                                                                                              | Reported on Page # |
|------------------------------------------------|----------------------------------------------------------------------------------------------------------------------------------------------------------|--------------------|
| <b>Domain 1: Research team and reflexivity</b> |                                                                                                                                                          |                    |
| <i>Personal Characteristics</i>                |                                                                                                                                                          |                    |
| 1. Interviewer/facilitator                     | Which author/s conducted the interview or focus group?                                                                                                   | 5                  |
| 2. Credentials                                 | What were the researcher's credentials?<br>E.g. PhD, MD                                                                                                  | 5,6                |
| 3. Occupation                                  | What was their occupation at the time of the study?                                                                                                      | 5,6                |
| 4. Gender                                      | Was the researcher male or female?                                                                                                                       | N/A                |
| 5. Experience and training                     | What experience or training did the researcher have?                                                                                                     | 5,6                |
| <i>Relationship with participants</i>          |                                                                                                                                                          |                    |
| 6. Relationship established                    | Was a relationship established prior to study commencement?                                                                                              | N/A                |
| 7. Participant knowledge of the interviewer    | What did the participants know about the researcher? e.g. personal goals, reasons for doing the research                                                 | N/A                |
| 8. Interviewer characteristics                 | What characteristics were reported about the interviewer/facilitator? e.g. Bias, assumptions, reasons and interests in the research topic                | N/A                |
| <b>Domain 2: study design</b>                  |                                                                                                                                                          |                    |
| <i>Theoretical framework</i>                   |                                                                                                                                                          |                    |
| 9. Methodological orientation and Theory       | What methodological orientation was stated to underpin the study? e.g. grounded theory, discourse analysis, ethnography, phenomenology, content analysis | 5,6                |
| <i>Participant selection</i>                   |                                                                                                                                                          |                    |
| 10. Sampling                                   | How were participants selected? e.g. purposive, convenience, consecutive, snowball                                                                       | 5                  |
| 11. Method of approach                         | How were participants approached? e.g. face-to-face, telephone, mail, email                                                                              | 5                  |
| 12. Sample size                                | How many participants were in the study?                                                                                                                 | 7                  |
| 13. Non-participation                          | How many people refused to participate or dropped out? Reasons?                                                                                          | 7                  |
| <i>Setting</i>                                 |                                                                                                                                                          |                    |



|                                        |                                                                                                                                 |      |
|----------------------------------------|---------------------------------------------------------------------------------------------------------------------------------|------|
| 14. Setting of data collection         | Where was the data collected? e.g. home, clinic, workplace                                                                      | 7    |
| 15. Presence of non-participants       | Was anyone else present besides the participants and researchers?                                                               | N/A  |
| 16. Description of sample              | What are the important characteristics of the sample? e.g. demographic data, date                                               | 7    |
| <i>Data collection</i>                 |                                                                                                                                 |      |
| 17. Interview guide                    | Were questions, prompts, guides provided by the authors? Was it pilot tested?                                                   | 6    |
| 18. Repeat interviews                  | Were repeat inter views carried out? If yes, how many?                                                                          | N/A  |
| 19. Audio/visual recording             | Did the research use audio or visual recording to collect the data?                                                             | 6    |
| 20. Field notes                        | Were field notes made during and/or after the inter view or focus group?                                                        | N/A  |
| 21. Duration                           | What was the duration of the inter views or focus group?                                                                        | 6    |
| 22. Data saturation                    | Was data saturation discussed?                                                                                                  | 5    |
| 23. Transcripts returned               | Were transcripts returned to participants for comment and/or correction?                                                        | N/A  |
| <b>Domain 3: analysis and findings</b> |                                                                                                                                 |      |
| <i>Data analysis</i>                   |                                                                                                                                 |      |
| 24. Number of data coders              | How many data coders coded the data?                                                                                            | 6,16 |
| 25. Description of the coding tree     | Did authors provide a description of the coding tree?                                                                           | N/A  |
| 26. Derivation of themes               | Were themes identified in advance or derived from the data?                                                                     | 6    |
| 27. Software                           | What software, if applicable, was used to manage the data?                                                                      | 6    |
| 28. Participant checking               | Did participants provide feedback on the findings?                                                                              | N/A  |
| <i>Reporting</i>                       |                                                                                                                                 |      |
| 29. Quotations presented               | Were participant quotations presented to illustrate the themes/findings? Was each quotation identified? e.g. participant number | 7-14 |
| 30. Data and findings consistent       | Was there consistency between the data presented and the findings?                                                              | 7-14 |
| 31. Clarity of major themes            | Were major themes clearly presented in the findings?                                                                            | 7-14 |
| 32. Clarity of minor themes            | Is there a description of diverse cases or discussion of minor themes?                                                          | 7-14 |

Once you have completed this checklist, please save a copy and upload it as part of your submission. When requested to do so as part of the upload process, please select the file type: *Checklist*. You will NOT be able to proceed with submission unless the checklist has been uploaded. Please DO NOT include this checklist as part of the main manuscript document. It must be uploaded as a separate file.

# BMJ Open

## Strategies to enhance recruitment and consent to intensive care studies: qualitative study with researchers and patient-public involvement contributors

|                                 |                                                                                                                                                                                                                                                                                                                                                                                                                                                                                                                                                                                                                                                                                                                                                                                                                                                                                                                                                                                                                                          |
|---------------------------------|------------------------------------------------------------------------------------------------------------------------------------------------------------------------------------------------------------------------------------------------------------------------------------------------------------------------------------------------------------------------------------------------------------------------------------------------------------------------------------------------------------------------------------------------------------------------------------------------------------------------------------------------------------------------------------------------------------------------------------------------------------------------------------------------------------------------------------------------------------------------------------------------------------------------------------------------------------------------------------------------------------------------------------------|
| Journal:                        | <i>BMJ Open</i>                                                                                                                                                                                                                                                                                                                                                                                                                                                                                                                                                                                                                                                                                                                                                                                                                                                                                                                                                                                                                          |
| Manuscript ID                   | bmjopen-2020-048193.R1                                                                                                                                                                                                                                                                                                                                                                                                                                                                                                                                                                                                                                                                                                                                                                                                                                                                                                                                                                                                                   |
| Article Type:                   | Original research                                                                                                                                                                                                                                                                                                                                                                                                                                                                                                                                                                                                                                                                                                                                                                                                                                                                                                                                                                                                                        |
| Date Submitted by the Author:   | 10-Aug-2021                                                                                                                                                                                                                                                                                                                                                                                                                                                                                                                                                                                                                                                                                                                                                                                                                                                                                                                                                                                                                              |
| Complete List of Authors:       | Paddock, Katie; Manchester Metropolitan University, Faculty of Education, Department of Childhood, Youth and Education Studies; University of Liverpool, Institute of Population Health, Department of Public Health, Policy and Systems<br>Woolfall, Kerry; University of Liverpool, Institute of Population Health, Department of Public Health, Policy and Systems<br>Frith, Lucy; University of Liverpool, Faculty of Humanities and social science, Departments of Law and philosophy<br>Watkins, Megan; University of Liverpool, Institute of Population Health, Department of Public Health, Policy and Systems<br>Gamble, Carrol; University of Liverpool, Institute of Population Health, Department of Biostatistics<br>Welters, Ingeborg; University of Liverpool, Institute of Life Course and Medical Science; Liverpool University Hospitals NHS Foundation Trust, Department of Critical Care<br>Young, Bridget; University of Liverpool, Institute of Population Health, Department of Public Health, Policy and Systems |
| <b>Primary Subject Heading</b>: | Intensive care                                                                                                                                                                                                                                                                                                                                                                                                                                                                                                                                                                                                                                                                                                                                                                                                                                                                                                                                                                                                                           |
| Secondary Subject Heading:      | Emergency medicine, Qualitative research                                                                                                                                                                                                                                                                                                                                                                                                                                                                                                                                                                                                                                                                                                                                                                                                                                                                                                                                                                                                 |
| Keywords:                       | INTENSIVE & CRITICAL CARE, QUALITATIVE RESEARCH, Adult intensive & critical care < INTENSIVE & CRITICAL CARE                                                                                                                                                                                                                                                                                                                                                                                                                                                                                                                                                                                                                                                                                                                                                                                                                                                                                                                             |
|                                 |                                                                                                                                                                                                                                                                                                                                                                                                                                                                                                                                                                                                                                                                                                                                                                                                                                                                                                                                                                                                                                          |

SCHOLARONE™  
Manuscripts



I, the Submitting Author has the right to grant and does grant on behalf of all authors of the Work (as defined in the below author licence), an exclusive licence and/or a non-exclusive licence for contributions from authors who are: i) UK Crown employees; ii) where BMJ has agreed a CC-BY licence shall apply, and/or iii) in accordance with the terms applicable for US Federal Government officers or employees acting as part of their official duties; on a worldwide, perpetual, irrevocable, royalty-free basis to BMJ Publishing Group Ltd ("BMJ") its licensees and where the relevant Journal is co-owned by BMJ to the co-owners of the Journal, to publish the Work in this journal and any other BMJ products and to exploit all rights, as set out in our [licence](#).

The Submitting Author accepts and understands that any supply made under these terms is made by BMJ to the Submitting Author unless you are acting as an employee on behalf of your employer or a postgraduate student of an affiliated institution which is paying any applicable article publishing charge ("APC") for Open Access articles. Where the Submitting Author wishes to make the Work available on an Open Access basis (and intends to pay the relevant APC), the terms of reuse of such Open Access shall be governed by a Creative Commons licence – details of these licences and which [Creative Commons](#) licence will apply to this Work are set out in our licence referred to above.

Other than as permitted in any relevant BMJ Author's Self Archiving Policies, I confirm this Work has not been accepted for publication elsewhere, is not being considered for publication elsewhere and does not duplicate material already published. I confirm all authors consent to publication of this Work and authorise the granting of this licence.

1  
2  
3  
4  
5  
6  
7  
8  
9

## Strategies to enhance recruitment and consent to intensive care studies: qualitative study with researchers and patient-public involvement contributors

10  
11

### Corresponding author:

12  
13  
14  
15  
16  
17  
18  
19

Dr Katie Paddock  
Faculty of Education, Department of Childhood, Youth and Education Studies,  
Manchester Metropolitan University  
1.43 Brooks Building, 53 Bonsall Street  
Manchester, M15 6GX  
k.paddock@mmu.ac.uk

20  
21

### Co-author details

22  
23  
24

Kerry Woolfall, Institute of Population Health, Department of Public Health, Policy and Systems,  
University of Liverpool, Liverpool, United Kingdom, k.woolfall@liverpool.ac.uk

25  
26  
27  
28

Lucy Frith, Faculty of Humanities and Social Science, Departments of Law and philosophy, ,  
University of Liverpool, Liverpool, United Kingdom, L.J.Frith@liverpool.ac.uk

29  
30  
31  
32

Megan Watkins, Institute of Population Health, Department of Public Health, Policy and Systems,  
University of Liverpool, Liverpool, United Kingdom, Megan.Watkins@liverpool.ac.uk

33  
34  
35  
36

Carrol Gamble, Institute of Population Health, Department of Biostatistics, University of Liverpool,  
Liverpool, United Kingdom, C.Gamble@liverpool.ac.uk

37  
38  
39  
40  
41

Ingeborg Welters, Department of Critical Care, Liverpool University Hospitals NHS Foundation Trust,  
Liverpool, United Kingdom / Institute of Life Course and Medical Sciences, University of Liverpool,  
Liverpool, UK, I.Welters@liverpool.ac.uk

42  
43  
44  
45

Bridget Young, Institute of Population Health, Department of Public Health, Policy and Systems,  
University of Liverpool, Liverpool, United Kingdom, Bridget.Young@liverpool.ac.uk

46  
47  
48  
49  
50  
51  
52  
53  
54  
55  
56  
57  
58  
59  
60

**Word count:** 6948

## Strategies to enhance recruitment and consent to intensive care studies: qualitative study with researchers and patient-public involvement contributors

K. Paddock (1,2); K. Woolfall (1); L. Frith (3); M. Watkins (1), C. Gamble (4); I. D. Welters (5, 6); B. Young (1)

(1) Institute of Population Health, Department of Public Health, Policy and Systems, University of Liverpool, Liverpool, United Kingdom;

(2) Faculty of Education, Department of Childhood, Youth and Education Studies, Manchester Metropolitan University, United Kingdom;

(3) Faculty of Humanities and Social Science, Departments of Law and Philosophy, The University of Liverpool, Liverpool, United Kingdom;

(4) Institute of Population Health, Department of Biostatistics, University of Liverpool, Liverpool, United Kingdom

(5) Department of Critical Care, Liverpool University Hospitals NHS Foundation Trust, Liverpool, United Kingdom

(6) Institute of Life Course and Medical Sciences, University of Liverpool, Liverpool, UK

### ABSTRACT

**Objective:** Clinical trials and studies in intensive care units (ICUs) have complex consent processes and often encounter problems in recruiting patients. By interviewing research team members about the challenges in critical care research we aimed to identify strategies to enhance recruitment and consent to ICU studies.

**Methods:** Semi-structured interviews with UK-based researchers (N=17) and patient-public involvement contributors (N=8) with experience of ICU studies. Analysis of transcripts of audio-recorded interviews drew on thematic approaches.

**Results:** Seven themes were identified. Participants emphasised the need for substitute decision-making processes in critical care studies, yet some researchers reported that research ethics committees were reluctant to approve such processes. Researchers spoke about the potential benefits of research without prior consent for studies with narrow recruitment windows but believed research ethics committees would not approve them. Participants indicated that the activity of patient-public involvement contributors was limited in critical care studies, though researchers who had involved patient-public involvement contributors more extensively were clear that their input when designing consent processes was important. Researchers and patient-public involvement contributors pointed to resource and staffing limitations as barriers to patient recruitment. Researchers varied in whether and how they used professional consultees as substitute decision-makers, in whether they approached families by telephone to discuss research, and in whether they disclosed details of research participation to bereaved relatives.

1  
2  
3 Conclusion: Critical care research could benefit from research ethics committees having expertise in  
4 consent processes that are suited to this setting, better staffing at research sites, more extensive  
5 patient-public involvement and an evidence base on stakeholder perspectives on critical care  
6 research processes. Guidance on professional consultee processes, telephoning relatives to discuss  
7 research, research without prior consent and disclosure of research participation to bereaved  
8 relatives could help to harmonise practice in these areas and enhance recruitment and consent to  
9 critical care studies.  
10  
11  
12

13 **Key Words:** critical care, consent, recruitment, qualitative methods  
14  
15  
16  
17

### 18 **Strengths and limitations**

- 19 • The study includes the views of UK-based researchers and PPI contributors to explore the  
20 problems that research teams encounter in recruiting and consenting to ICU studies
- 21 • A sample of just 8 PPI contributors limits the scope of perspectives included in this study,  
22 though does reflect researchers' reliance on a small pool of PPI contributors for their  
23 studies.
- 24 • Most of the studies discussed at interview were interventional and there may be distinct  
25 issues in recruiting and consenting to observational ICU studies that our findings do not  
26 cover.
- 27 • We focused on UK based participants, so transferability of findings to other contexts may be  
28 limited.  
29  
30  
31  
32  
33  
34  
35

## 36 **INTRODUCTION**

37  
38 Clinical research in intensive care units (ICUs) is essential for improving care and treatments for  
39 critically ill patients. However, patients often lack decisional capacity at the point when they are  
40 recruited to critical care studies and the 'gold standard model' of consent, where an autonomous  
41 patient makes an informed decision about whether to take part in research, is not applicable.<sup>1,2</sup> To  
42 make sure patients can benefit from the improvements to care that research brings, regulations  
43 have been developed in many countries to permit enrolment of incapacitated patients.<sup>3-5</sup> These aim  
44 to balance the rights of these patients with the need for research in ICUs and other settings where  
45 patients do not have capacity.<sup>6</sup> Box 1 below summarises the regulations governing recruitment and  
46 consent of incapacitated patients to research in England and Wales, as outlined by the Health  
47 Research Authority (HRA), while variants of these requirements apply in Scotland and Northern  
48 Ireland.  
49  
50  
51  
52  
53

54 Despite regulations permitting recruitment of incapacitated patients to studies, successfully  
55 implementing research and recruiting patients in critical care settings can be challenging. A review  
56 by Schandelmaier and colleagues<sup>7</sup> found that trials in emergency care and ICUs are four times more  
57 likely to be prematurely discontinued due to slow patient recruitment compared to trials outside  
58 these settings. Approximately 44% of randomized control trials do not meet their recruitment  
59  
60

1  
2  
3 targets<sup>8</sup>. In addition to the recruitment barriers that are widely reported in many specialties,<sup>9-13</sup>  
4 critical care trials face numerous specific challenges.<sup>7 14</sup> Several of these challenges arise from the  
5 time sensitive nature of treatments in this setting, with necessarily short time windows for  
6 recruitment of patients for many studies. Recruitment often takes place out of hours, when staffing  
7 and other resourcing may not be adequate to support research demands, and family members are  
8 often not available or able to act as substitute decision makers. However, Schandelmaier and  
9 colleagues<sup>7</sup> noted that studies in their review rarely reported detailed reasons for recruitment  
10 problems.  
11  
12  
13

14  
15 To better understand the challenges in recruiting and consenting incapacitated patients to research  
16 in critical care settings, we conducted in-depth qualitative interviews with critical care research staff  
17 in the UK. As we were particularly interested in understanding the interface between the legal  
18 frameworks around consent processes and the practicalities of implementing recruitment to ICU  
19 studies, interviews explored what influenced researchers when designing recruitment and consent  
20 processes, as well as their experience of recruiting to studies. Our overall goal was to identify ways  
21 that recruitment and consent could be enhanced in ICU studies. To ensure studies are designed and  
22 implemented in ways that are patient-centred, researchers in a growing number of countries are  
23 now expected to involve patients and the public when designing and implementing studies.<sup>15-21</sup>  
24 Therefore, we also interviewed people who had been patient-public involvement (PPI) contributors  
25 on ICU studies in addition to interviewing critical care researchers.  
26  
27  
28  
29  
30  
31

32 **Box 1: Overview of approaches to recruitment and consent seeking with incapacitated patients in**  
33 **England and Wales\* by study type**  
34

35 **i) Clinical trials of investigational medicinal products (CTIMPs)**  
36

37  
38 ***CTIMPs in non-emergency situations***

39 Investigators can seek prospective consent from an incapacitated patient's legally  
40 designated personal representatives. Personal representatives are personally known to  
41 the patient, such as a family member or a close friend. However, if there is no  
42 representative, they are not available or they are unwilling to act (i.e. you can't contact  
43 them or they don't want to make that decision) a doctor who is independent of the study  
44 can act as a legally designated professional representative, and approve a patient's  
45 recruitment to a trial in certain circumstances. Researchers will usually seek consent (e.g.  
46 for continued participation and further disclosure of confidential information) from the  
47 patient, if and when they regain capacity.  
48  
49  
50

51  
52 ***CTIMPs in emergency situations***

53 When investigating treatments that must be administered urgently and it is not  
54 reasonably practicable to obtain consent from a legally designated representative,  
55 patients can be recruited into a trial without prior consent. This is known as research  
56 without prior consent (RWPC). As patients recruited under this process may regain  
57 capacity to give consent, researchers are required to plan how they will involve patients in  
58 the on-going consent process. Trial participation and any relevant consent required (e.g.  
59  
60

consent for continued participation and disclosure of confidential information) should be discussed with legally designated representative, or patient if they regain capacity, as soon as possible after the patient's recruitment to the trial.

## ii) Other study types (non-CTIMPS)

Other study types are those that involve the processing of personal data, administration of interviews or observations, and clinical trials that are not CTIMPs.

### ***Other types of study in non-emergency situations***

Before a patient is recruited to such a study, investigators are required to seek advice from the patient's personal consultee, usually a family member, about the patient's likely wishes. If investigators are unable to identify a personal consultee they can consult with a nominated consultee, which is usually a doctor responsible for the patient's care who has no connection to the research. When a patient recruited under a consultee process subsequently regains capacity, study participation should be discussed.

### ***Other types of study in emergency situations***

Patients can be recruited without prior advice from a consultee, provided it is not reasonably practicable to seek such advice in advance. Investigators need to seek agreement of a registered medical practitioner who is not involved in the organization or conduct of the study - unless there is insufficient time to obtain that agreement. The consultee's advice should be sought on the participant's likely views and feelings about the study as soon as possible after recruitment. If objections are raised, the patient must be withdrawn unless doing so would pose a risk to the participant's health. When a patient recruited under a consultee process subsequently regains capacity, study participation should be discussed.

\*Adapted from the UK Health Research Authority website with reference to relevant legislation.<sup>22-24</sup>

## METHODS

### **Overview**

Interviews were conducted between late 2016 and mid-2017 as one workstream within the wider mixed-methods Perspectives study. The Perspectives study sought to develop good practice guidance on recruitment and consent processes for ICU studies. Given these pragmatic aims, the study was broadly critical realist in approach.

### **Patient and public involvement**

This study included two PPI contributors, who were not specifically involved in this workstream.

### **Sampling and recruitment**



1  
2  
3 We sampled UK researchers who had experience of designing or conducting ICU studies by searching  
4 the National Institute for Health Research (NIHR) research portfolio, trial registries and snowball  
5 sampling via critical care researchers and networks. Researchers were eligible if they had been  
6 involved in critical care studies which had included at least one UK centre and was in set up,  
7 ongoing, or had been published within the previous two years. We sent researchers an invitation  
8 email outlining the Perspectives study and attached a participant information sheet with further  
9 details.  
10  
11

12  
13 PPI contributors were eligible if they had been research partners, steering group members or  
14 advisors on ICU studies. We initially identified them by asking interviewed researchers to email PPI  
15 contributors who they had recently worked with. Researchers sent PPI contributors an invitation  
16 email and a participant information sheet. We identified relatively few PPI contributors via this  
17 route, at least in part because research teams often seemed to rely on the same few PPI  
18 contributors for multiple studies. Therefore, we also placed an advertisement for potential PPI  
19 participants in a newsletter that ICUsteps, a UK charity for ICU patients and families,<sup>25</sup> circulated to  
20 their members. A total of 15 PPI contributors responded to our requests for participants, and eight  
21 were interviewed. Five did not respond to arrange an interview date and two declined over concerns  
22 they might breach the confidentiality of the study they were involved in.  
23  
24  
25  
26  
27

28 KP contacted researchers and PPI contributors who replied to the invitation, further explaining the  
29 study and arranging the interviews. Sampling of participants aimed for data saturation, the point at  
30 which further interviews no longer add to the analysis.<sup>26</sup>  
31  
32

### 33 Interviews

34 The interviews were conducted by KP, a post-doctoral research psychologist with experience in  
35 qualitative methods. Interviews were semi-structured to ensure key topics were explored, whilst  
36 also conversational to enable participants to raise previously unanticipated issues. To avoid idealised  
37 responses, interviews focused on specific studies that participants had been involved with. The  
38 interview topic guide (Box 2) was initially informed by published literature and the research team's  
39 experience in this area and then developed iteratively over the course of interviewing. As  
40 participants were located throughout the UK, interviews were conducted via telephone. Participants  
41 gave informed consent before being interviewed and PPI contributors were offered a £25 shopping  
42 voucher to acknowledge their contribution to the study.  
43  
44  
45  
46  
47

#### 48 Box 2: Summary of topic guides for researchers and PPI contributors

49 *Interviews with researchers explored their accounts of:*

- 50 • ethical, regulatory, scientific and pragmatic considerations that guided decision-making about  
51 the design of recruitment and consent methods in their studies;
- 52 • experiences of seeking ethical approval and feedback from research ethics committees;
- 53 • experiences of implementing different recruitment and consent processes, including the  
54 timing of recruitment, consultation and consent seeking, involvement of different staff in this  
55 process;
- 56 • perceived barriers to implementing recruitment and consent as planned;
- 57  
58  
59  
60

- suggestions for improving recruitment and consent processes.

*Interviews with PPI contributors explored their accounts of:*

- recruitment and consent processes in ICU studies they had been involved with;
- awareness of considerations that had informed recruitment and consent processes;
- opinions of these recruitment and consent processes;
- awareness of any problems that arose during the studies;
- suggestions for improving recruitment and consent processes.

## Analysis

Transcripts of audio-recorded interviews were checked for accuracy and pseudo-anonymised prior to analysis. KP led the analysis in close consultation with BY (a psychologist and qualitative methodologist); both read all transcripts multiple times. Analysis was broadly interpretive and informed by the literature on quality and rigour in qualitative research.<sup>27</sup> We drew on thematic approaches<sup>28</sup> but conducted the analysis at multiple levels, from line by line coding, to consideration of participants' narratives at a holistic level in order to ensure coherence and contextualisation. The developing analysis was discussed with wider members of the study team, which included individuals with expertise in qualitative methods, bioethics, critical care, and clinical trials. We used NVivo software to assist with indexing and coding the data.

To evidence our interpretations we present data excerpts, denoting researchers with an R before their identification code and PPI contributors with P.

## RESULTS

### Participant and interview characteristics

We invited 26 researchers and interviewed 17 (65%); the remaining nine researchers did not respond to invitation emails. Of the 17 interviewed researchers (10 male, 7 female), 10 were consultants and one was a specialist registrar in intensive care medicine. The remaining six had backgrounds in academic research, clinical trial management or nursing in intensive care settings. Eight had 15 or more years' experience in critical care research, seven had between 5-14 years and two had less than 4 years critical care research experience. A total of 15 PPI contributors responded to the study team to express an interest in participating and we interviewed eight. As we recruited PPI contributors via participating researchers and an advertisement, we are unable to report how many received invitations but did not respond. Of the 8 PPI contributors (6 male, 2 female), all except 2 reported that they had lived experience of ICU care as a patient, relative or both.

Interviews usually lasted between 45-60 minutes. A total of 33 ICU studies were discussed (4 observational, 29 interventional), although some PPI contributors had difficulty remembering details of the studies they were involved in.

### Qualitative findings

The present findings are organised into seven themes. We turn first to participants' accounts of the design of recruitment and consent processes, before presenting their perspectives on the practical implementation of these processes in studies. We note that the terminology used by participants often differed to that used in guidance and regulations. For brevity and reflecting the terminology of participants, we use the term *consultee* to refer to substitute decision makers in both CTIMPS and non-CTIMPS.

#### Designing recruitment and consent processes

##### ***Designing consent processes was felt to be straightforward but often lacked patient-public involvement***

Unsurprisingly, researchers spoke of regulatory requirements as an important influence on the design of their studies. Some specifically mentioned following a three tier consent "*hierarchy*" (R20) in which informed consent from patients was regarded as the most acceptable process, with consultation with a personal consultee as intermediate, and use of professional consultees reserved for instances when patient informed consent and a personal consultee process were not possible.

*"The hierarchy is, er, patient consent, if patient consent is not possible then declaration by a personal consultee. If the personal consultee is either not available or it's not appropriate to consult them, it's a declaration by a nominated [professional] consultee... a critical care consultant who is not immediately, who is not involved in the research study and is not immediately involved in the care of the patient"* (R20).

Beyond this hierarchy researchers commented that the design of the recruitment and consent processes was relatively straightforward and largely determined by study type and the overall research aims, "*it's dictated by what the study is and what you're trying to demonstrate*" (R11). They carried forward processes that they had used in previous studies "*we just really used the same process for the second study, it was, you know, pretty much accepted*" (R15), and emphasised the many years of ICU clinical and research experience that they and their teams had to draw on when designing recruitment and consent processes.

Several researchers described having consulted with PPI contributors about their studies. A few believed that PPI contributors had an important role in informing consent processes. For example, R19 commented that PPI contributors had influenced their research team's decision to take a "*proportionate*" approach to the consent process in their study of using a professional consultee process when relatives were unavailable or speaking with them would pose an "*unnecessary or excessive burden on relatives at a difficult time.*" However, most researchers indicated that consultation with PPI contributors had largely involved them commenting on study patient information materials rather than directly informing the design of recruitment and consent processes. While one researcher said that PPI input "*wasn't necessary*" (R11), more commonly researchers believed PPI input to the design of recruitment and consent processes was limited because "*you needed to be a clinician to understand the parameters*" (R13).

1  
2  
3 Echoing the accounts of researchers, PPI contributors mostly described having limited input to the  
4 design of recruitment and consent processes with their roles largely being to comment on patient  
5 and family information materials and attend study steering group meetings. Also echoing the  
6 accounts of some researchers, several PPI contributors commented that their input was limited by  
7 their lack of clinical knowledge. However, some also linked their limited input to how research teams  
8 implemented PPI. For example, PPI being sought after the design of studies was largely settled,  
9 studies only having one PPI member, and a lack of support and training for PPI contributors, *“there’s  
10 no training for PPI... it can be a very daunting environment for someone who is perhaps retired and  
11 has come from a relatively “normal” background”* (P25). One PPI contributor also commented that  
12 some critical care researchers were *“half-hearted”* (P6) about PPI and did not use it to its full  
13 potential.  
14  
15  
16  
17

### ***Anticipated challenges of gaining ethics approval influenced the design of some studies***

18  
19  
20 Researchers’ experiences of preparing for and gaining research ethics committee (REC) approval for  
21 their studies were mixed. Some indicated that gaining REC approval was *“very straightforward”*  
22 (R11). This included several researchers who had obtained approval to use substitute decision  
23 makers in their studies. Outlining the REC’s rationale for approving enrolment to their study via a  
24 *“declaration by a nominated consultee”* where necessary, R20 explained:  
25  
26

27  
28 *“The reason the ethics committee agreed... we were keen to have a blood test on the day of  
29 severe acute [name of condition] and... they also accepted that the relatives are not always  
30 available and even if they are available, they may be too distressed”* (R20).  
31  
32

33 Some researchers commented that they and their study teams had become adept in understanding  
34 what ethics committees would or would not approve. One described having *“built up a relationship”*  
35 (R7) with a REC and working in a mutual learning cycle, whereby the REC gained experience in  
36 reviewing studies involving incapacitated patients, whilst their research team used the REC’s  
37 feedback over numerous previous studies to cumulatively fine tune their processes and patient  
38 materials for new applications. Similarly, another researcher spoke of selecting RECs who were  
39 experienced in dealing with ICU studies and avoiding ones without such experience: *“if you have a  
40 difficulty it’s because you’ve gone to the wrong REC”* (R18). The feedback such researchers received  
41 from RECs on their applications largely amounted to minor revisions to patient information  
42 materials.  
43  
44  
45

46  
47 Others described the challenges they had encountered in gaining approval for their studies. These  
48 researchers felt RECs were *“negative”* (R11) and described instances of RECs refusing to approve  
49 consent processes that were commonplace in ICU studies:  
50  
51

52  
53 *“Making you justify, endlessly, why, in an incapacitated patient, you can’t take a form of  
54 consent. It’s like an uphill battle... Despite going and justifying the rationale, they tend to just  
55 come back and say ‘no, we don’t want you to do that, we want you to take written consent  
56 or we want you to try without telephone consent and if you’re struggling to recruit, come  
57 back to us and then we’ll give you, then we might give you telephone consent”* (R4).  
58  
59  
60

1  
2  
3 Commenting on the narrow time windows of many ICU studies, several researchers were interested  
4 in whether research without prior consent (RWPC) would help to address such challenges. However,  
5 one researcher described having been denied REC permission for RWPC in their study, while others  
6 commented that they had anticipated problems in ethical gaining approval for RWPC<sup>1</sup> and so had *a*  
7 *priori* ruled out RWPC when developing their funding and ethics applications. R8 explained the  
8 potential implications for investigating the efficacy of the time sensitive study intervention in their  
9 study:  
10  
11

12  
13 *“If therapies aren't started within a specific, um, time window... their potential, um, efficacy*  
14 *might be lost... we're currently trying to get a sedation study funded and we think that using*  
15 *it very early is likely to be beneficial but we're probably going to, um, compromise that*  
16 *because we know we won't be able to get consent quickly enough if we don't get, um,*  
17 *deferred consent” (R8).*  
18  
19

20  
21 Similarly, R1 attributed their team's previous decision not to seek REC approval for RWPC in a study  
22 to the difficulty of justifying the use of RWPC. R1 linked this difficulty to a lack of evidence on  
23 stakeholder perspectives on RWPC at the time the team were designing the study, and noted that  
24 evidence of stakeholders' perspectives on RWPC had since been published in the context of  
25 paediatric emergency and critical care studies.  
26  
27

28  
29 *“We just couldn't see how we could quite justify it [RWPC], but I think we might have had a*  
30 *go at justifying it by using a lot of the other work that's going on at the moment, especially*  
31 *through some of [name of researcher]'s stuff... I would have been a bit braver” (R1).*  
32  
33

34 Without recourse to RWPC, R1 suggested that their study was “*delaying treatment essentially*” and  
35 elaborated on the concerns this raised: “*my main worry.... in the real world you would be starting*  
36 *that protocol at the point of when they've met the eligibility criteria... rather than an hour and a half*  
37 *later” (R1).* Speaking of the “*lack of clarity*” regarding RWPC as a “*major, major challenge for critical*  
38 *care research*”, R4 pointed to differences in attitudes towards RWPC between the HRA (the national  
39 authority in the UK that oversees governance in healthcare research), and individual ethics  
40 committees:  
41  
42

43  
44 *“The people at the top were very clearly saying if the [consent] process is delaying when you*  
45 *feel this biological plausibility of the intervention should occur, you should be going to the*  
46 *ethics committee and saying, I need to have emergency provision because of that, whereas*  
47 *my experience is when you go to individual ethics committees, that that's not the view a lot*  
48 *of them take” (R4).*  
49  
50

51  
52 Despite these and other challenges, few researchers commented on input from PPI contributors as  
53 being relevant on such issues when seeking REC approval, although some did comment in more  
54 general terms about PPI input being helpful in discussions with ethics committees:  
55  
56

---

57  
58 <sup>1</sup> Several interviewees used terms such as “deferred consent” or “emergency provision” to  
59 refer to RWPC.  
60

1  
2  
3  
4  
5  
6  
7  
8  
9  
10  
11  
12  
13  
14  
15  
16  
17  
18  
19  
20  
21  
22  
23  
24  
25  
26  
27  
28  
29  
30  
31  
32  
33  
34  
35  
36  
37  
38  
39  
40  
41  
42  
43  
44  
45  
46  
47  
48  
49  
50  
51  
52  
53  
54  
55  
56  
57  
58  
59  
60

*“Make sure that there are some PPIs to feed into... that also creates very sort of strong basis for discussions with the ethics committee... otherwise you go into these things without sort of a leg to stand on if they don’t feel it’s the right, but if you’ve been able to discuss it with the ethics committee based on feedback from patients... it makes it a lot stronger” (R1).*

Again, concurring with the accounts of most researchers, the PPI contributors we interviewed commented that they had provided little or no input to the REC applications for the ICU studies that they were involved with.

## **Implementing recruitment and consent processes**

### ***Need for alternatives to prospective informed consent from patients***

In their accounts of implementing research, almost all researchers and several PPI contributors emphasised the difficulty of obtaining prospective informed consent from patients in the ICU, and the need for substitute decision makers. Recruiting patients was often a “24/7” (R4) activity and patient eligibility for a study could change rapidly, yet staff support for research was costly and usually only available during office hours. Moreover, as both PPI contributors and researchers commented, much critical care research was time critical and study recruitment windows often did not coincide with relatives being present to act as personal consultees.

*“Things can happen so fast and... well if the relative’s gone home and suddenly there’s been a deterioration or there’s, you know, where they think hang on a minute... do we want to get them on to the study. Well you could be waiting six hours for the relative to come back in” (P21).*

*“You’re having to do this time sensitive, face to face with the relative at an appropriate time... then 24/7 recruitment is really challenging because it’s very difficult to staff your ICU seven days a week... into the evenings... the cost of staffing you’re doing is very high” (R4).*

While emphasising the need for substitute decision makers, some researchers worried that regulation permitting such consent was precarious and spoke of the potential for future changes that could, for example, restrict the use of substitute decision-makers and make ICU research “*even more difficult to undertake*” (R13), be “*disastrous for critical care, um, because it just, it would, it would preclude research really*” (R12).

### ***Challenges of using personal consultees***

Both researchers and PPI contributors described the complexities of approaching family members to act as personal consultees when patients were incapacitated. They emphasised that family members are in a “*frantic state*” (R2) when patients are critically ill with feeling of anxiety going “*through the roof*” (P21) and the difficulties families would have in taking in information and making a decision about a study. In this context, PPI contributors spoke of the need for researchers to be “*very gentle*” (P9) when approaching families, while researchers spoke of their strong urge not to add to the families’ distress and of the tensions appropriately timing the approach to families when studies often required consultation with family members very soon after a patient’s admission to ICU and



1  
2  
3 *“there’s a lot of anxiety from the relatives”* (R11). They also described family members as sometimes  
4 being reluctant to make decisions about research on behalf of the patient and as *“much more risk*  
5 *averse...than they [patients] would’ve been for themselves”* (R15). When a patient had multiple  
6 family members, difficulties could also arise in establishing who should act as a patient’s personal  
7 consultee and sometimes family members could not agree about whether a patient should be  
8 recruited. Several researchers also spoke of the complexities of contacting families by telephone to  
9 discuss research. A few were reluctant to do so and one researcher indicated that their REC was  
10 reluctant to permit families being approached about research over the telephone. Such complexities  
11 led some researchers to question whether involving family members in decisions about research, in  
12 the hours after a patient’s admission, was necessarily superior to the use of professional consultees  
13 or RWPC.  
14  
15  
16  
17

18  
19 *“Are we kidding ourselves that we’re doing some truly ethical process where actually, would*  
20 *it be best to just use [RWPC] and say you know, this has been through a whole load of checks*  
21 *and balances?”* (R2).  
22

23  
24 *“I feel that it’s more ethic, it’s more ethical to use the professional consent and to gain*  
25 *consent from relatives when they are in the, you know, when they are kind of feeling more*  
26 *comfortable and less panicky about what’s happened to their relatives”* (R13).  
27  
28  
29

### 30 **Challenges of using professional consultees**

31 In contrast, a few researchers were uneasy about the use of professional consultees for other  
32 reasons. Indeed, one spoke of making strenuous efforts to “avoid” this process, noting concerns  
33 about how it might be perceived “externally” (R3):  
34  
35

36  
37 *“You can see how it could be externally perceived that the consultant who signs as the*  
38 *professional consultee could seem to have a conflict of interest with regards to not upsetting*  
39 *his colleague who is the investigator... We’ve always usually, by hook or by crook, been able*  
40 *to identify a personal consultee”* (R3).  
41  
42

43 Other researchers spoke about whether to *“go to a professional legal representative versus wait for*  
44 *the relatives”* as *“a grey area”* (R4). They varied in how they managed this, with some tending to  
45 reserve professional consultees for situations where family members could not be traced within a  
46 given period.  
47  
48

49  
50 *“Where we know there’s a next of kin but they can’t come up face to face. And in that*  
51 *setting we would lose the patient 'cause we generally only use a professional where there*  
52 *are, is no next of kin at all or we’re not aware of any next of kin following a, um, detailed*  
53 *search”* (R8).  
54  
55

56 A few researchers described more flexible processes in which they extended use of professional  
57 consultees to situations where it was considered burdensome or unfeasible to ask families to make a  
58 decision.  
59  
60

1  
2  
3 *“If it looks like the family are going to come in then we’ll wait for them and talk to them. But*  
4 *if it’s going to be not feasible, or there is some reason why it would be very last minute to*  
5 *talk to them, and, you know, disproportionate or unfair on them, then we have an ability to*  
6 *take the professional advice” (R19).*  
7  
8

9  
10 R19 added that they reserved the use of professional consultees only for studies that involved  
11 treatments already in widespread clinical use, whereas for studies involving more novel treatments  
12 the patient would not be recruited without first speaking to the family. A variant on the above  
13 process involved researchers contacting the family members in advance of a patient’s recruitment to  
14 inform them of a plan to recruit the patient to a study under a professional consultee process. R19  
15 and R15 referred to using this process, albeit with some unease on R15’s part:

16  
17  
18 *“If the relative was in Australia for instance we would tell them about the trial, see if they*  
19 *had any objections, and then we would get professional consent...but I just felt a lot more*  
20 *comfortable if I could catch the relatives” (R15).*  
21  
22

23  
24 Regardless of the different perspectives and arrangements surrounding the use of professional  
25 consultees, some researchers commented that family members were generally accepting of this  
26 process when told about it ‘after the event’, often readily endorsing the patient’s continued  
27 participation in a study. *“If you’d obtained a physician consent... then people are often very happy to*  
28 *say that’s great, I don’t have any objections to you carrying on. But if you ask them to give the*  
29 *consent then they would be reluctant to make a decision” (R18).*  
30  
31

32  
33 Those PPI contributors who spoke about professional consultee processes felt that it was acceptable  
34 *“if the safeguards are all in place... I’m quite comfortable with that” (P17),* although several  
35 expressed some reluctance or attached caveats to their support. *“I’m just a little bit wary... you just*  
36 *need a couple of caveats of, in there about who it is doing it, and that they’re sufficiently*  
37 *independent to actually take in the patient’s best interests” (P6).*  
38  
39

#### 40 ***Challenges of seeking consent from patients after they regain capacity***

41 For patients who regain capacity after being recruited to studies under a personal or professional  
42 consultee process, it is a requirement for researchers to seek the patient’s consent. However, as  
43 researchers remarked, patients *“may appear to have capacity” (R4)* but this could fluctuate rapidly,  
44 and they could have an array of sometimes subtle physical, cognitive and emotional difficulties  
45 influencing their capacity. As R13 noted: *“they’re not critically ill but... they’re still nowhere near*  
46 *100% and I’m not sure they’ve got real energy to think about [research]”.* PPI contributors echoed  
47 these comments:  
48  
49

50  
51  
52 *“If I’ve just been woken up from a ventilator or sedation or I’m going into high dependency*  
53 *from ICU do I really want papers, documents, people coming to me and talking about the*  
54 *study and wanting my signature” (P24)*  
55  
56

57 Therefore, judging when a patient could be approached about a study was challenging: *“the ability*  
58 *of the research staff, even if they’re very experienced, to assess that is also very, very difficult” (R4)*  
59 and often involved researchers returning to assess a patient several times:  
60



1  
2  
3  
4  
5  
6  
7  
8  
9  
10  
*“Consenting I would say is one of the most time-consuming things that the research nurses do. So they’ll often have to go back and see people, either on the ICU or in the ward, three, four, maybe five times before people actually regain capacity and they can actually consent them” (R11).*

11  
12  
13  
14  
15  
16  
17  
18  
19  
20  
21  
22  
23  
24  
25  
26  
27  
28  
29  
30  
31  
32  
33  
34  
35  
36  
37  
38  
39  
40  
41  
42  
43  
44  
45  
46  
47  
48  
49  
50  
51  
52  
53  
54  
55  
56  
57  
58  
59  
60  
Complexities could also arise if samples or other study procedures were required soon after a patient had started to regain consciousness: *“once a patient is awake and kind of aware then you can’t really approach them for a study procedure without telling them about the study... they’re just realising how sick they were... it’s just all too much” (R18).*

### **Challenges when a patient dies**

With mortality rates in ICUs of around 25%, some patients recruited to studies will not survive their illness. Where patients recruited to studies under a professional consultee process subsequently die, bereaved family members may be unaware that their deceased relative participated in a study.<sup>11</sup> Researchers who had encountered this issue varied in their accounts of how they managed it. One indicated that their practice was to inform bereaved relatives about the patient’s participation and ask them whether they wished the patient’s data to be retained in the study:

*“By the time you’ve got to the relatives the patient has already died, then you would... tell them that before [the patient] died they were put in a study, and, er, that [the family members] just need to be aware of that... you’ve obtained professional consent then you would give the relatives the option to say ‘do you wish the data to be used or not used?’” (R18).*

In contrast, R4 did not discuss the research with bereaved relatives and referred to published guidance to support their team’s practice:

*“In England, under the professional legal representative... our understanding from the guidance we had was if the patient died and we didn’t have any other form of consent or non-objection we could retain the patient in the study, because under the Mental Capacity Act, the professional legal representative was a valid form of documentation to include someone in a study” (R4).*

In line with the advice from their PPI group, R19 similarly described their usual practice was not to inform bereaved relatives that the patient had taken part in a study, unless there were exceptional circumstances:

*“Our patient and public groups think that on the whole unless there’s a particular reason why you need to tell the relatives, er, why something happened, they don’t really want us approaching relatives of patients who’ve died... We do sometimes, but on average no, it’s very study specific. If [...] a serious adverse event has occurred then we would, because we’ve got a duty to disclose” (R19).*

1  
2  
3 While perspectives on this issue varied, researchers agreed that further guidance was needed on  
4 whether and how to disclose study enrolment and retention of data to families, when a patient  
5 recruited under a professional consultee process subsequently dies.  
6  
7

8 PPI contributors who spoke about this issue also varied in their opinions. One concurred with R4 and  
9 R19, commenting that it was not *“ethical to approach people who are grieving in that way”* (P23).  
10 Another acknowledged the considerable difficulties involved but was doubtful whether these  
11 justified *“withholding”* information about a patient’s research participation from bereaved family  
12 members *“ethically that seems even more, er, wrong to not be able to give people that information.*  
13 *So, um, so I don’t know”* (P6).  
14  
15  
16

## 17 DISCUSSION

18  
19 Our findings add empirical evidence about some of the difficulties that underlie previously reported  
20 problems in recruiting to ICU studies. Others have commented that studies in critical and  
21 emergency settings rarely reported detailed reasons for recruitment problems<sup>7</sup> – our study provides  
22 an in-depth account of the reasons why these studies encounter recruitment difficulties and points  
23 to several ways to address these difficulties (see Box 3).  
24  
25

26 Reflecting the regulations governing research, participants regarded informed consent by the  
27 patient as the most acceptable form of consent but emphasised that it was impossible to seek such  
28 consent when patients lacked decisional capacity. As others have similarly found,<sup>29 30</sup> researchers  
29 reported variation in how RECs responded to their proposed consent processes, with a few reporting  
30 that some RECs were reluctant to approve consent processes that were commonly used in ICU  
31 studies. These findings point to the continued importance of ensuring RECs that review ICU studies  
32 having relevant expertise and understanding of recruitment and consent for ICU studies. For ICU  
33 studies with very narrow recruitment time windows, researchers spoke about the potential benefits  
34 of RWPC. A few had considered RWPC for their studies, but felt that RECs would not approve this  
35 process so they did not pursue it. Researchers wanted further guidance from RECs on the use of  
36 RWPC to ensure studies appropriately balanced both ethical and scientific considerations. Box 3  
37 below summarises these and other factors that could benefit recruitment to ICU studies.  
38  
39  
40  
41  
42

43 The accounts of both researchers and PPI contributors indicated that PPI activity was largely limited  
44 to the development of study information materials for patients and families. Researchers who  
45 involved PPI contributors more broadly pointed to the value of their input, particularly in helping to  
46 resolve questions about consent processes, such as the use of professional consultees and the  
47 disclosure of study enrolment to bereaved families. This echoes findings from other research  
48 contexts where PPI was found to be helpful in addressing various challenges and ensuring research  
49 was acceptable and relevant to patients.<sup>30 31 32</sup> Extending PPI beyond the development of study  
50 information materials to the design, planning and implementation of studies could benefit critical  
51 care research, although PPI contributors would need support and training to help them feel  
52 confident in commenting on ICU study consent processes. We have developed an accessible  
53 animation that could help as part of such training.<sup>33</sup>  
54  
55  
56  
57  
58

59 In describing the implementation of recruitment and consent processes, researchers and PPI  
60 contributors were clear that recruiting patients would benefit from improved staffing and

1  
2  
3 resourcing, as others have previously reported<sup>14</sup>. Researchers were also concerned to avoid adding  
4 to the distress of families when recruiting to studies, but family members often had to be  
5 approached about research during or soon after a patient's admission to ICU. Some researchers  
6 described deliberating over when to use personal or professional consultees in such situations;  
7 where studies involved interventions that were well understood or had particularly tight timescales,  
8 a few described using professional consultees rather than personal consultees to avoid distressing  
9 families. Others regarded the use of professional consultees as questionable and avoided it  
10 altogether. Accounts also differed on the acceptability of approaching families by telephone to  
11 discuss research. Our findings resemble those from other contexts<sup>34 35 36</sup> in pointing to the  
12 uncertainties and dilemmas that some researchers experience in recruiting to studies, and to how  
13 researchers can gain confidence in recruiting and consenting to studies from knowing that the  
14 perspectives of patients and families have informed study protocols. There are also indications that  
15 the use of telephone consent in the UK has increased in response to the COVID-19 pandemic, given  
16 the restrictions in hospital visiting rules and risk of infection<sup>37</sup>. Including specific advice in study  
17 protocols on issues such as the use professional consultees and approaching families by telephone  
18 to discuss research, informed by evidence on the perspectives of patients and other stakeholders  
19 and co-produced with PPI contributors, could help to address remaining uncertainty in these areas  
20 and potentially help to avoid non-recruitment of eligible patients.  
21  
22  
23  
24  
25  
26  
27

28 Variations were also evident when participants spoke about situations where a patient had been  
29 recruited to a study under a professional consultee process and the patient later died before the  
30 family had been informed about the study. Researchers wanted further guidance on whether to  
31 disclose to bereaved family members that their relative had been recruited to a study. Including  
32 specific advice on this in study protocols informed by evidence on families' perspectives and co-  
33 developed with PPI contributors could inform management of this sensitive issue. Such an approach  
34 has been useful in addressing methodological challenges in organ donation research<sup>38</sup>, while  
35 research evidence on stakeholders' perspectives has been pivotal in informing guidance on  
36 bereavement in the context of the critical care studies involving children.<sup>39-41</sup> Evidence on the  
37 perspectives of patients, relatives and staff regarding consent processes in adult critical care studies  
38 has been collected as part of the wider Perspectives study and could be similarly informative on this  
39 and other issues.  
40  
41  
42  
43  
44

### 45 **Box 3: Factors that could benefit recruitment and consent to ICU studies**

- 46 • Ensuring that RECs which review ICU studies have relevant expertise and understanding of  
47 recruitment and consent for studies involving incapacitated patients within narrow time  
48 windows
- 49 • Widening the scope of PPI in ICU studies and supporting PPI contributors to feel confident  
50 in contributing to the design of recruitment and consent processes
- 51 • Better staffing for recruiting patients
- 52 • Evidence on the perspectives of patients, relatives and staff regarding recruitment and  
53 consent processes in adult critical care studies
- 54 • Guidance on:
  - 55 ○ Requirements for ethical approval of RWPC
  - 56
  - 57
  - 58
  - 59
  - 60

- Circumstances in which to use a professional consent/consultee process
- Use of telephone or videoconferencing to discuss research with relatives
- Whether bereaved relatives should be informed of the patient's research participation

Our study has some limitations. First, despite trying different ways to access PPI contributors with experience of ICU studies we interviewed fewer than anticipated, at least in part because researchers tended to rely on a small pool of PPI contributors for their studies. It is possible that the perspectives of the PPI contributors who we interviewed do not reflect the breadth of PPI in ICU studies. Nevertheless, most researchers similarly described that the scope of PPI in ICU studies was limited. Second, interviews took place between late 2016 to mid-2017 and PPI input to ICU studies may have expanded since. Third, most of the studies discussed in the interviews were interventional and there may be distinct issues in recruiting and consenting to observational ICU studies that our findings do not cover. Finally, all participants were UK based. Cultural, legal and practice differences between countries means that caution is needed in transferring the findings to other countries.

In conclusion, this study offers insights on the problems that research teams encounter in recruiting and consenting to ICU studies and ways these could potentially be overcome. Our findings indicate that the critical care research could benefit from further support and guidance in the areas summarised in Box 3 above. Widening the scope of PPI in ICU studies and using evidence on the perspectives of patients and relatives to inform recruitment and consent to studies may be particularly important. Insights from these can help to ensure that protocols and guidance are patient centred, as well as help research teams to feel more confident in recruiting and consenting to studies.

### **Acknowledgements**

The authors are grateful to the researchers and PPI contributors who participated in the interviews. We are also grateful to the Perspectives Study Advisory group.

### **Contributorship statement**

BY, KW, LF, CG and IW designed the Perspectives study. KP conducted the interviews and led the data analysis in close collaboration with BY. BY led on drafting the manuscript in close collaboration with KP. KW, LF, CG, IW and MW contributed to further drafts of the manuscript. All authors have read and approved the manuscript.

### **Competing interests**

None declared.

### **Funding**

This work was supported by the UK Economic and Social Research Council (grant number ES/N006372/1).

### **Data sharing statement**

1  
2  
3 Data will be available on a safeguarded basis via the UK Data Service (UKDS) repository  
4 <http://reshare.ukdataservice.ac.uk>  
5  
6

### 7 **Ethics statement**

8 The University of Liverpool provided ethical approval (reference 0465) for this workstream of  
9 Perspectives.  
10  
11  
12  
13

### 14 **References**

- 15  
16  
17 1. Gillett GR. Intensive care unit research ethics and trials on unconscious patients.  
18 *Anaesthesia and intensive care* 2015;43(3):309-12. doi: 10.1177/0310057x1504300304  
19 [published Online First: 2015/05/07]
- 20  
21 2. Shepherd V. Advances and challenges in conducting ethical trials involving populations  
22 lacking capacity to consent: A decade in review. *Contemporary clinical trials*  
23 2020;95:106054. doi: 10.1016/j.cct.2020.106054 [published Online First: 2020/06/12]
- 24  
25 3. Jackson CN, Liaw P, Bagshaw S, et al. Data initiatives supporting critical care research  
26 and quality improvement in Canada: an environmental scan and narrative review.  
27 *Canadian journal of anaesthesia/ Journal canadien d'anesthesie* 2020
- 28  
29 4. Furyk JS, Lawton LD, Ting JY, et al. Informed consent in emergency care research: An  
30 oxymoron? *Emerg Med Australas* 2017;29(1):110-12.
- 31  
32 5. Luce JM, Cook DJ, Martin TR, et al. The ethical conduct of clinical research involving  
33 critically ill patients in the United States and Canada: principles and recommendations.  
34 *American journal of respiratory and critical care medicine* 2004;170(12):1375.
- 35  
36 6. Dickert NW, Miller FG. Involving patients in enrolment decisions for acute myocardial  
37 infarction trials. *BMJ* 2015;351:h3791. doi: 10.1136/bmj.h3791 [published Online First:  
38 2015/08/01]
- 39  
40 7. Schandelmaier S, Von Elm E, You JJ, et al. Premature discontinuation of randomized  
41 trials in critical and emergency care: a retrospective cohort study. *Crit Care Med*  
42 2016;44(1):130-37.
- 43  
44 8. Walters SJ, Bonacho dos Anjos Henriques-Cadby I, Bortolami O, et al Recruitment and  
45 retention of participants in randomised controlled trials: a review of trials funded and  
46 published by the United Kingdom Health Technology Assessment Programme *BMJ Open*  
47 2017;7:e015276. doi: 10.1136/bmjopen-2016-015276
- 48  
49 9. Natale P, Saglimbene V, Ruospo M, et al. Transparency, trust and minimizing burden to  
50 increase recruitment and retention in trials: a systematic review. *J Clin Epidemiol.* 2021  
51 Jun;134:35-51. doi: 10.1016/j.jclinepi.2021.01.014. Epub 2021 Jan 27. PMID: 33515656.
- 52  
53 10. Briel M, Olu KK, von Elm E, et al. A systematic review of discontinued trials suggested  
54 that most reasons for recruitment failure were preventable. *Journal of Clinical*  
55 *Epidemiology* 2016;80:8-15. doi: 10.1016/j.jclinepi.2016.07.016
- 56  
57 11. Unger JM, Vaidya R, Hershman DL, et al. Systematic Review and Meta-Analysis of the  
58 Magnitude of Structural, Clinical, and Physician and Patient Barriers to Cancer Clinical  
59 Trial Participation. *J Natl Cancer Inst* 2019;111(3):245-55. doi: 10.1093/jnci/djy221  
60 [published Online First: 2019/03/12]

12. van der Zande IS, van der Graaf R, Hooft L, et al. Facilitators and barriers to pregnant women's participation in research: a systematic review. *Women and Birth* 2018;31(5):350-61.
13. Hughes-Morley A, Young B, Waheed W, et al. Factors affecting recruitment into depression trials: Systematic review, meta-synthesis and conceptual framework. *Journal of Affective Disorders* 2015;172:274-90. doi: <http://dx.doi.org/10.1016/j.jad.2014.10.005>
14. Pattison N, Arulkumaran N, Humphreys S, et al. Exploring obstacles to critical care trials in the UK: a qualitative investigation. *Journal of the Intensive Care Society* 2017;18(1):36-46.
15. Frank L, Basch E, Selby JV. The PCORI perspective on patient-centered outcomes research. *JAMA* 2014;312(15):1513-14.
16. Staniszewska S, Denegri S, Matthews R, et al. Reviewing progress in public involvement in NIHR research: developing and implementing a new vision for the future. *BMJ open* 2018;8(7):e017124.
17. Impact of public involvement on ethical aspects of research: Health Research Authority / INVOLVE [Available from: <https://www.invo.org.uk/wp-content/uploads/2016/05/Impact-of-public-involvement-on-the-ethical-aspects-of-research-updated-2016.pdf> accessed 30/06/2020.
18. Strategy for patient-oriented research: patient engagement framework: Canadian Institutes of Health Research; 2014 [Available from: <https://cihr-irsc.gc.ca/e/48413.html> accessed 30/06/2020.
19. Statement on consumer and community involvement in health and medical research National Health and Medical Research Council and the Consumers Health Forum of Australia; 2016 [Available from: <https://www.nhmrc.gov.au/about-us/publications/statement-consumer-and-community-involvement-health-and-medical-research> accessed 30/06/2020.
20. Schilling I, Behrens H, Hugenschmidt C, et al. Patient involvement in clinical trials: motivation and expectations differ between patients and researchers involved in a trial on urinary tract infections. *Journal of Research Involvement and Engagement* 2019;5(1):15.
21. Sacristán JA, Aguarón A, Avendaño-Solá C, et al. Patient involvement in clinical research: why, when, and how. *Patient Preference and Adherence* 2016;10:631.
22. Research in emergency settings: Health Research Authority [Available from: <https://www.hra.nhs.uk/planning-and-improving-research/policies-standards-legislation/research-emergency-settings/> accessed 30/06/2020.
23. Principles of consent: Adults not able to consent for themselves (England and Wales): Health Research Authority [Available from: <http://www.hra-decisiontools.org.uk/consent/principles-ALC-EnglandandWales.html> accessed 30/06/2020.
24. Mental Capacity Act: Health Research Authority [Available from: <https://www.hra.nhs.uk/planning-and-improving-research/policies-standards-legislation/mental-capacity-act/> accessed 30/06/2020.
25. ICUsteps [Available from: <https://www.icusteps.org/> accessed 30/06/2020].
26. Guest G, Bunce A, Johnson L. How many interviews are enough? An experiment with data saturation and variability. *Field Method* 2006;18(1):59-82.



- 1
  - 2
  - 3
  - 4
  - 5
  - 6
  - 7
  - 8
  - 9
  - 10
  - 11
  - 12
  - 13
  - 14
  - 15
  - 16
  - 17
  - 18
  - 19
  - 20
  - 21
  - 22
  - 23
  - 24
  - 25
  - 26
  - 27
  - 28
  - 29
  - 30
  - 31
  - 32
  - 33
  - 34
  - 35
  - 36
  - 37
  - 38
  - 39
  - 40
  - 41
  - 42
  - 43
  - 44
  - 45
  - 46
  - 47
  - 48
  - 49
  - 50
  - 51
  - 52
  - 53
  - 54
  - 55
  - 56
  - 57
  - 58
  - 59
  - 60
27. Levitt HM, Motulsky SL, Wertz FJ, et al. Recommendations for designing and reviewing qualitative research in psychology: Promoting methodological integrity. *Qualitative psychology* 2017;4(1):2.
28. Braun V, Clarke V. Using thematic analysis in psychology. *Qualitative Research in Psychology* 2006;3(2):77-101. doi: 10.1191/1478088706qp063oa
29. Dixon-Woods M, Angell EL. Research involving adults who lack capacity: how have research ethics committees interpreted the requirements? *Journal of Medical Ethics* 2009;35(6):377-81. doi: 10.1136/jme.2008.027094 [published Online First: 2009/06/02]
30. Tridente A, Holloway PA, Hutton P, et al. Methodological challenges in European ethics approvals for a genetic epidemiology study in critically ill patients: the GenOSept experience. *BMC Medical Research Ethics* 2019;20(1):30.
31. Crocker JC, Ricci-Cabello I, Parker A, et al. Impact of patient and public involvement on enrolment and retention in clinical trials: systematic review and meta-analysis. *BMJ* 2018;363:k4738. doi: 10.1136/bmj.k4738 [published Online First: 2018/11/30]
32. Forsythe LP, Carman KL, Szydlowski V, et al. Patient Engagement In Research: Early Findings From The Patient-Centered Outcomes Research Institute. *Health Aff (Millwood)* 2019;38(3):359-67. doi: 10.1377/hlthaff.2018.05067 [published Online First: 2019/03/05]
33. Research in the Intensive Care Unit: Perspectives Study Team 2019 [Available from: [https://www.youtube.com/watch?time\\_continue=2&v=6HOTEIv46ec&feature=emb\\_title](https://www.youtube.com/watch?time_continue=2&v=6HOTEIv46ec&feature=emb_title) accessed 30/06/2020.
34. Donovan JL, Paramasivan S, de Salis I, et al. Clear obstacles and hidden challenges: understanding recruiter perspectives in six pragmatic randomised controlled trials. *Trials* 2014;15(1):5.
35. Dudley L, Gamble C, Preston J, et al. What difference does patient and public involvement make and what are its pathways to impact? Qualitative study of patients and researchers from a cohort of randomised clinical trials. *PLoS One* 2015;10(6):e0128817.
36. Mann C, Chilcott S, Plumb K, et al. Reporting and appraising the context, process and impact of PPI on contributors, researchers and the trial during a randomised controlled trial-the 3D study. *Research Involvement and Engagement* 2018;4(1):15.
37. GenOMICC. (2020). GenOMICC study protocol version 2.4. Retrieved from <https://genomicc.org/>
38. Noyes J, McLaughlin L, Morgan K, et al. Designing a co-productive study to overcome known methodological challenges in organ donation research with bereaved family members. *Health Expectations* 2019;22(4):824-35.
39. Woolfall K, Frith L, Gamble C, et al. How parents and practitioners experience research without prior consent (deferred consent) for emergency research involving children with life threatening conditions: a mixed method study. *BMJ Open* 2015;5(9)
40. Woolfall K, Frith L, Dawson A, et al. Fifteen-minute consultation: an evidence-based approach to research without prior consent (deferred consent) in neonatal and paediatric critical care trials. *Archives of Disease in Childhood-Education Practice Digest* 2016;101(1):49-53.
41. Picton A, Woolfall K, Lyttle MD, et al. Research without prior consent in paediatric emergency and critical care medicine. *Paediatrics and Child Health* 2020;30(2):74-78.



## Consolidated criteria for reporting qualitative studies (COREQ): 32-item checklist

Developed from:

Tong A, Sainsbury P, Craig J. Consolidated criteria for reporting qualitative research (COREQ): a 32-item checklist for interviews and focus groups. *International Journal for Quality in Health Care*. 2007. Volume 19, Number 6: pp. 349 – 357

| No. Item                                       | Guide questions/description                                                                                                                              | Reported on Page # |
|------------------------------------------------|----------------------------------------------------------------------------------------------------------------------------------------------------------|--------------------|
| <b>Domain 1: Research team and reflexivity</b> |                                                                                                                                                          |                    |
| <i>Personal Characteristics</i>                |                                                                                                                                                          |                    |
| 1. Interviewer/facilitator                     | Which author/s conducted the interview or focus group?                                                                                                   | 5                  |
| 2. Credentials                                 | What were the researcher's credentials?<br>E.g. PhD, MD                                                                                                  | 5,6                |
| 3. Occupation                                  | What was their occupation at the time of the study?                                                                                                      | 5,6                |
| 4. Gender                                      | Was the researcher male or female?                                                                                                                       | N/A                |
| 5. Experience and training                     | What experience or training did the researcher have?                                                                                                     | 5,6                |
| <i>Relationship with participants</i>          |                                                                                                                                                          |                    |
| 6. Relationship established                    | Was a relationship established prior to study commencement?                                                                                              | N/A                |
| 7. Participant knowledge of the interviewer    | What did the participants know about the researcher? e.g. personal goals, reasons for doing the research                                                 | N/A                |
| 8. Interviewer characteristics                 | What characteristics were reported about the interviewer/facilitator? e.g. Bias, assumptions, reasons and interests in the research topic                | N/A                |
| <b>Domain 2: study design</b>                  |                                                                                                                                                          |                    |
| <i>Theoretical framework</i>                   |                                                                                                                                                          |                    |
| 9. Methodological orientation and Theory       | What methodological orientation was stated to underpin the study? e.g. grounded theory, discourse analysis, ethnography, phenomenology, content analysis | 5,6                |
| <i>Participant selection</i>                   |                                                                                                                                                          |                    |
| 10. Sampling                                   | How were participants selected? e.g. purposive, convenience, consecutive, snowball                                                                       | 5                  |
| 11. Method of approach                         | How were participants approached? e.g. face-to-face, telephone, mail, email                                                                              | 5                  |
| 12. Sample size                                | How many participants were in the study?                                                                                                                 | 7                  |
| 13. Non-participation                          | How many people refused to participate or dropped out? Reasons?                                                                                          | 7                  |
| <i>Setting</i>                                 |                                                                                                                                                          |                    |

|                                        |                                                                                                                                 |      |
|----------------------------------------|---------------------------------------------------------------------------------------------------------------------------------|------|
| 14. Setting of data collection         | Where was the data collected? e.g. home, clinic, workplace                                                                      | 7    |
| 15. Presence of non-participants       | Was anyone else present besides the participants and researchers?                                                               | N/A  |
| 16. Description of sample              | What are the important characteristics of the sample? e.g. demographic data, date                                               | 7    |
| <i>Data collection</i>                 |                                                                                                                                 |      |
| 17. Interview guide                    | Were questions, prompts, guides provided by the authors? Was it pilot tested?                                                   | 6    |
| 18. Repeat interviews                  | Were repeat inter views carried out? If yes, how many?                                                                          | N/A  |
| 19. Audio/visual recording             | Did the research use audio or visual recording to collect the data?                                                             | 6    |
| 20. Field notes                        | Were field notes made during and/or after the inter view or focus group?                                                        | N/A  |
| 21. Duration                           | What was the duration of the inter views or focus group?                                                                        | 6    |
| 22. Data saturation                    | Was data saturation discussed?                                                                                                  | 5    |
| 23. Transcripts returned               | Were transcripts returned to participants for comment and/or correction?                                                        | N/A  |
| <b>Domain 3: analysis and findings</b> |                                                                                                                                 |      |
| <i>Data analysis</i>                   |                                                                                                                                 |      |
| 24. Number of data coders              | How many data coders coded the data?                                                                                            | 6,16 |
| 25. Description of the coding tree     | Did authors provide a description of the coding tree?                                                                           | N/A  |
| 26. Derivation of themes               | Were themes identified in advance or derived from the data?                                                                     | 6    |
| 27. Software                           | What software, if applicable, was used to manage the data?                                                                      | 6    |
| 28. Participant checking               | Did participants provide feedback on the findings?                                                                              | N/A  |
| <i>Reporting</i>                       |                                                                                                                                 |      |
| 29. Quotations presented               | Were participant quotations presented to illustrate the themes/findings? Was each quotation identified? e.g. participant number | 7-14 |
| 30. Data and findings consistent       | Was there consistency between the data presented and the findings?                                                              | 7-14 |
| 31. Clarity of major themes            | Were major themes clearly presented in the findings?                                                                            | 7-14 |
| 32. Clarity of minor themes            | Is there a description of diverse cases or discussion of minor themes?                                                          | 7-14 |

Once you have completed this checklist, please save a copy and upload it as part of your submission. When requested to do so as part of the upload process, please select the file type: *Checklist*. You will NOT be able to proceed with submission unless the checklist has been uploaded. Please DO NOT include this checklist as part of the main manuscript document. It must be uploaded as a separate file.
